# 1 **The interaction landscape between transcription factors and the** 2 **nucleosome**

3

4 Fangjie Zhu<sup>1</sup>, Lucas Fanung<sup>2</sup>, Eevi Kaasinen<sup>1</sup>, Biswajyoti Sahu<sup>1</sup>, Yimeng Yin<sup>1</sup>, Bei Wei<sup>1</sup>,  
5 Svetlana Dodonova<sup>2</sup>, Patrick Cramer<sup>2,3</sup> and Jussi Taipale<sup>1,4,\*</sup>

6

7 <sup>1</sup>*Division of Functional Genomics and Systems Biology, Department of Medical Biochemistry*  
8 *and Biophysics, Karolinska Institutet, Scheeles väg 2, SE 171 77 Stockholm, Sweden.*

9 <sup>2</sup>*Max Planck Institute for Biophysical Chemistry, Department of Molecular Biology, Am*  
10 *Fassberg 11, D-37077 Göttingen, Germany.*

11 <sup>3</sup>*Center for Innovative Medicine and Science for Life Laboratory, Department of Biosciences*  
12 *and Nutrition, Karolinska Institutet, Hälsovägen 7, SE 141 83 Stockholm, Sweden.*

13 <sup>4</sup>*Genome-Scale Biology Program, Post Office Box 63, FI-00014 University of Helsinki,*  
14 *Helsinki, Finland.*

15 *\*To whom correspondence should be addressed. E-mail: [jussi.taipale@ki.se](mailto:jussi.taipale@ki.se)*

16

17 **Nucleosomes cover most of the genome and are thought to be displaced by**  
18 **transcription factors (TFs) in regions that direct gene expression. However, the modes**  
19 **of interaction between TFs and nucleosomal DNA remain largely unknown. Here, we**  
20 **use nucleosome consecutive affinity-purification systematic evolution of ligands by**  
21 **exponential enrichment (NCAP-SELEX) to systematically explore interactions between**  
22 **the nucleosome and 220 TFs representing diverse structural families. Consistently with**  
23 **earlier observations, we find that the vast majority of TFs have less access to**  
24 **nucleosomal DNA than to free DNA. The motifs recovered from TFs bound to**  
25 **nucleosomal and free DNA are generally similar; however, steric hindrance and**  
26 **scaffolding by the nucleosome result in specific positioning and orientation of the motifs.**  
27 **Many TFs preferentially bind close to the end of nucleosomal DNA, or to periodic**  
28 **positions at its solvent-exposed side. TFs often also bind nucleosomal DNA in a**  
29 **particular orientation, because the nucleosome breaks the local rotational symmetry of**  
30 **DNA. Some TFs also specifically interact with DNA located at the dyad position where**  
31 **only one DNA gyre is wound, whereas other TFs prefer sites spanning two DNA gyres**  
32 **and bind specifically to each of them. Our work reveals striking differences in TF**  
33 **binding to free and nucleosomal DNA, and uncovers a rich interaction landscape**  
34 **between the TFs and the nucleosome.**

35

36         Simple prokaryotic organisms such as *E.coli* have relatively small genomes, which  
37 are often organized into a circular chromosome consisting of a single DNA molecule. Their  
38 genes are regulated by TFs that directly bind to the free DNA molecule and influence  
39 transcriptional activity. Eukaryotic genomes, however, are much larger, and need to be  
40 packaged more efficiently inside the nucleus. The packaging is accomplished by a specific  
41 class of basic proteins, the histones, which exist as an octameric complex and bind to the  
42 DNA backbone, forming nucleosomes<sup>1-4</sup>. In a canonical nucleosome, a 147 bp segment of  
43 DNA is wrapped around the histone octamer in a left-handed, superhelical arrangement for a  
44 total of 1.65 turns, with the DNA helix entering and exiting the nucleosome from the same  
45 side of the histone octamer. The two DNA gyres are paralleling each other except at the  
46 position located between the entering and the exiting DNA, where a dyad region of ~15 bp  
47 contains only a single DNA gyre. The nucleosome is 2-fold pseudo-symmetric with respect to  
48 a dyad axis at the center of the dyad region. Approximately 70% of eukaryotic DNA is  
49 packaged into nucleosomes, separated from each other by free DNA linker sequences of 10–  
50 80 bp<sup>5-7</sup>.

51         The nucleosome presents a significant barrier for binding of other proteins such as  
52 RNA polymerases to DNA<sup>8-14</sup>. As a consequence, the presence of nucleosomes can have a  
53 negative effect on gene expression. Similarly, most TFs are thought to be unable to bind to  
54 nucleosomal DNA, and TF binding sites in the genome are usually depleted of  
55 nucleosomes<sup>15-17</sup>. However, it is thought that a specific class of TFs, the pioneer factors, can  
56 access nucleosomal DNA, and assist the binding of other TFs to nearby sites<sup>18-22</sup>. Many TFs  
57 that have essential roles in development and cell reprogramming are pioneer factors<sup>23,24</sup>. Two  
58 different mechanisms have been suggested to be responsible for the pioneering activity:  
59 mimicking the linker histones<sup>25</sup> and/or targeting a partial TF motif that is accessible on  
60 nucleosomal DNA<sup>26</sup>.

61         Nucleosomes can also indirectly induce cooperativity between multiple TF binding  
62 events<sup>27-31</sup>. This cooperation can occur in the absence of direct TF-TF interactions<sup>32</sup>, allowing  
63 multiple weak binding events to dissociate nucleosomes, resulting in a preferred range of  
64 spacings between the two TF binding sites<sup>33</sup>. Consistently, in higher eukaryotes, most  
65 occupied TF binding sites are clustered to short genomic regions<sup>34-37</sup>.

66         Despite the importance of the nucleosome in both chromatin organization and  
67 transcriptional control, the effect of nucleosomes on TF binding has not been systematically  
68 characterized. This is in part because the sites bound by both a TF and a nucleosome are  
69 difficult to identify in cells, as the methods to map cellular TF binding locations are  
70 imprecise. Furthermore, TF-nucleosome complexes that activate chromatin remodeling in  
71 cells are expected to be unstable, and thus hard to capture experimentally. In our recent work,  
72 we found that scaffolding by DNA results in a large number of interactions between  
73 transcription factors<sup>38</sup>. Given that the DNA scaffold is bent and partially blocked by the  
74 nucleosome, it is likely that nucleosome occupancy will also have a major effect on TF-DNA  
75 binding.

76

## 77 RESULTS

### 78 Nucleosome CAP-SELEX

79 To determine the effect of nucleosome on TF-DNA binding, we adapted our previous  
80 Consecutive Affinity-Purification SELEX (CAP-SELEX) method<sup>38</sup> to include nucleosome  
81 reconstitution. We name this approach Nucleosome CAP-SELEX (NCAP-SELEX). We  
82 designed two types of SELEX ligands, a 147 bp (lig147) and a 200 bp (lig200) ligand,  
83 containing 101 bp and 154 bp randomized regions, respectively. In the NCAP-SELEX assay  
84 (**Fig. 1a**), recombinant histone octamers containing tagged H2A proteins (**Extended Data**  
85 **Fig. 1a, b**) are first loaded onto the DNA ligands (**Extended Data Fig. 1c, d**) in 384-well  
86 microplates by decreasing the salt concentration in a stepwise fashion (see **Methods** and  
87 Dyer *et al.*<sup>39</sup>). Subsequently, the nucleosomes are purified using magnetic beads. Eluted  
88 nucleosomes are incubated with TFs having an orthogonal tag, and the TF-bound species are  
89 subsequently pulled-down. The bound DNA is then amplified using PCR, and the entire  
90 process is repeated for a total of five times. To determine whether the TF binding induces  
91 dissociation of nucleosomes, the nucleosomes are recaptured after the final cycle (**Fig. 1a**).  
92 Both the nucleosome-bound and unbound DNA of the final cycle, as well as input DNA and  
93 DNA from the earlier cycles are then sequenced using a massively parallel sequencer.

94 To determine the effect of nucleosomes on TF binding, the ligand sequences were  
95 analyzed computationally using motif matching, *de novo* motif discovery and mutual  
96 information pipelines as illustrated in **Extended Data Fig. 1e**. In most analyses, we estimate  
97 TF signals using an approach that is based on the mutual-information (MI) between 3-mer  
98 distributions at two non-overlapping positions of the ligand (**Fig. 1b**). The underlying  
99 rationale is that if a binding event contacts two positions of a SELEX ligand at the same time,  
100 the 3-mer distributions at these two positions would be correlated in the enriched library, with  
101 the joint distribution favoring the 3-mer combinations that form the high-affinity sites. This  
102 biased joint distribution would then be detected as an increase in MI between the positions.  
103 Such an approach has multiple advantages: it operates without previous knowledge of TF  
104 specificities, enables facile comparison of selectivity between different TFs, and pinpoints the  
105 positions where DNA interacts with the TFs.

106 For the library enriched by each TF, we calculated MI between all pairwise  
107 combinations of positions, and represented the results as a 2D heatmap (**Fig. 1b**). In the  
108 heatmap showing MI from all 3-mer pairs (total MI; **Fig. 1b**, right), stripes with ~ 10 bp  
109 spacing are visible in addition to the TF signals. These stripes reflect the nucleosome signal,  
110 as histones contact DNA at ~ 10 bp intervals<sup>40-43</sup>. To focus more on the TF signals, we further  
111 developed a measure that considers only the MI between the ten most enriched non-  
112 overlapping 3-mer pairs (E-MI; **Fig. 1b**, left). As TFs rarely bind or cooperate across a large  
113 span of DNA, their signals are usually located at the diagonal of the 2D E-MI map.  
114 Therefore, the E-MI diagonal (**Fig. 1b**, bottom left) captures most of the footprints of TFs on  
115 the ligands, and corresponds well with the distribution of matches to the TFs' motifs (**Fig. 1b**,  
116 bottom right).

117 We performed NCAP-SELEX using 413 human TF extended DNA binding domains  
118 (eDBDs) (details are given in **Supplementary Table 1** and **Methods**). The selected TFs

119 covered 28% of the high-confidence TFs reported by Vaquerizas *et al.*<sup>44</sup>. Among the tested  
120 TFs, 220 eDBDs were successful (**Fig. 1c**; see **Methods** for details).

### 121 **Nucleosome inhibits TF binding**

122 We next analyzed the effect of nucleosome on TF binding by clustering the E-MI  
123 diagonal signals from the lig200. The result reveals that the binding of almost all TFs to DNA  
124 is inhibited or spatially restricted by the presence of a nucleosome (**Fig. 2a**). The lig200 can  
125 accommodate only one nucleosome, but allows multiple positions for it (**Fig. 2a**, schematic at  
126 the center). The nucleosome occupancy is thus expected to increase towards the center of the  
127 lig200. The penetration of the E-MI diagonal signal into the center, in turn, reflects the ability  
128 of each TF to bind to nucleosomal DNA. Analysis of this data revealed that TFs from the  
129 same family tend to cluster together based on the E-MI diagonal (**Fig. 2a**; SOX TFs indicated  
130 as an example). However, the extent of the penetration varied strongly between the TFs (**Fig.**  
131 **2b**). For example, SREBF1 and 2, and RFX3 (**Fig. 2c**, left) only show E-MI signal at the  
132 extreme ends of the ligand, suggesting that they have weak affinity towards nucleosomal  
133 DNA relative to free DNA. In contrast, TFs such as VSX1, ARX, and SOX12 display  
134 stronger signal near the center (**Fig. 2c**, right), and are thus more capable of binding to the  
135 nucleosome-occupied regions.

### 136 **TFs can bind sequences located on both nucleosomal DNA gyres**

137 For lig200 libraries, we next analyzed the entire 2D E-MI signals for individual TFs.  
138 This analysis resulted in identification of a specific binding mode for T-box TFs on  
139 nucleosomal DNA. Binding of brachyury (T) to nucleosomal DNA resulted in two prominent  
140 E-MI signals (**Fig. 3a**, the heatmap). One was located at the E-MI diagonal, i.e. observed  
141 between adjacent 3-mers, whereas the other resulted from 3-mers located ~ 80 bp from each  
142 other. The first signal is due to the binding of T to nucleosomal DNA using motifs similar to  
143 those found on free DNA (**Fig. 3a**, Mode 1). The second is associated with an approximately  
144 80-bp-long motif (**Fig. 3a**, Mode 2), indicating a dimeric binding spanning the two gyres of  
145 the nucleosomal DNA (**Fig. 3b**). We next compared the bound and unbound libraries of the  
146 last cycle, and found that the signal for Mode 2 is stronger on the ligands that remained  
147 bound to the nucleosome (**Fig. 3c**), indicating that the gyre-spanning binding stabilizes  
148 mononucleosomes against dissociation. The Mode 2 binding is also observed for another T-  
149 box factor, TBX2, and is not detected on free DNA (**Extended Data Fig. 2a, b**).

150 Interestingly, the scaffolding effect of the nucleosome also leads to TF binding modes  
151 that contact nucleosomal DNA at positions spaced by approximately 40 bp (e.g. TBX2 and  
152 ETV, as shown in **Extended Data Fig. 2b, c**). This effect is position-specific, with one  
153 binding event being observed near the dyad, and the other(s) on the opposite side of the  
154 nucleosome, with the two contacts separated by ~180°. As the individual TFs are located far  
155 from each other in this binding mode, the binding pattern suggests that the nucleosome may  
156 have two allosteric states or may form a higher order complex with these TFs.

157 Taken together, these results reveal that some TFs can interact with both DNA gyres  
158 on the nucleosome, and suggest that nucleosome can generate novel composite TF-binding

159 sites on DNA by promoting spatial proximity of DNA sites that are located more distally on  
160 free DNA.

### 161 **Nucleosome context breaks the rotational symmetry of DNA**

162 As DNA is double-stranded, TFs can bind to it in two different orientations. For TFs  
163 that bind non-palindromic sites, their binding orientation can be determined from the bound  
164 sequences. In analysis of motif matches on lig200, we noted that some TFs' motifs displayed  
165 a bias of matches in one orientation at the 5' end, and in the other orientation at the 3' end of  
166 the ligand. That is, these TFs have a preferred orientation relative to the nucleosome. We  
167 systematically examined this asymmetric effect between binding orientations by comparing  
168 the strand-wise distributions of top 8-mers (**Fig. 3d**, **Extended Data Fig. 3a**, see also  
169 **Methods** for details).

170 Both the extent of the orientational asymmetry and the associated p-value (**Fig. 3d**)  
171 revealed that many ETS factors displayed strong orientational preferences. ELF2 is shown in  
172 **Fig. 3e** as an example; its motif distributions (**Fig. 3e**, upper panel) and top 8-mer  
173 distributions (**Extended Data Fig. 3b**) display strong orientational preference. CREB factors  
174 also show considerable orientational preference towards the nucleosome in NCAP-SELEX  
175 (**Extended Data Fig. 3c**). The orientational asymmetry induced by the nucleosome can be  
176 explained by the fact that DNA is rotationally pseudosymmetric, and this symmetry is broken  
177 by the presence of the nucleosome (**Extended Data Fig. 3d**), leading to a different local  
178 environment for a TF bound at the same position of DNA in opposite orientations (**Fig. 3e**,  
179 red and yellow ovals). Depending on its orientation, a particular side of a TF will be in  
180 proximity with either the second gyre of nucleosomal DNA, or the histone proteins.

181 The distributions of motif matches in the two strands were symmetric with regard to  
182 the dyad position of the nucleosome. This, in turn, is a consequence of the pseudo 2-fold  
183 symmetry of the nucleosome; two binding sites in different orientations will share an  
184 identical configuration when they locate at opposite sides of the dyad, and have an equal  
185 distance to the dyad (**Fig. 3e**, models in the lower panel).

186 To determine whether the directional binding of TFs to a nucleosome is also observed  
187 *in vivo*, we performed MNase digestion followed by paired-end sequencing for the human  
188 colorectal cancer cell line LoVo. We then visualized the distribution of MNase fragments  
189 around directional ELF2 motif matches within ELF2 ChIP-seq peaks from Yan et al.<sup>37</sup> (**Fig.**  
190 **3f**). As described previously<sup>45</sup>, this visualization reveals nucleosomes near the TF sites due to  
191 enrichment of fragments whose size corresponds to a single nucleosome. The footprint of the  
192 TF is also seen as a V-shaped line having lower signal intensity (arrowheads in **Fig. 3f**). This  
193 analysis shows that both the nucleosome distribution and the TF footprint size are  
194 asymmetric with respect to the ELF2 sites. For the specified motif direction, the footprint of  
195 ELF2 is more distinct downstream of the nucleosome than upstream of it. This implies a  
196 more stable binding of ELF2 downstream of the nucleosome, which is in accordance with the  
197 motif match analysis from the ELF2 NCAP-SELEX data (**Fig. 3e**). The MNase analysis also  
198 indicated that nucleosome occupancy is lower upstream than that downstream of ELF2 sites.  
199 This pattern suggests that the more stable binding of ELF2 downstream of the nucleosome

200 displaces the nucleosome or pushes it upstream. Similar to ELF2, the binding profile of ELF1  
201 is also asymmetric with regard to nucleosome both in SELEX and *in vivo* (**Extended Data**  
202 **Fig. 3e**).

### 203 **Nucleosome induces positional preference to TF binding**

204 We next analyzed the positional preference of TF binding on nucleosomal DNA using  
205 the short lig147 ligand. Because its 147-bp length exactly matches the preferred length of  
206 nucleosomal DNA, the nucleosome is expected to be uniquely positioned at the center of  
207 lig147. Therefore, the relative positioning of the TFs with respect to the nucleosome can be  
208 inferred at a higher resolution than using lig200. To determine the positional preference, we  
209 first checked whether TFs' motifs on nucleosomal DNA are different from their motifs on  
210 free DNA. For this purpose, we compared the most enriched 9-mer sequences for each TF,  
211 between its lig147 libraries enriched either in the presence and absence of the nucleosome  
212 (**Extended Data Fig. 4a**). The result shows that most TFs bind to similar 9-mers under both  
213 conditions, suggesting that TFs are binding nucleosomal DNA without significant specificity  
214 changes. However, consistent with earlier observations<sup>26</sup>, we also found few cases where the  
215 binding specificities of the TFs were detectably different on nucleosomal DNA (**Extended**  
216 **Data Fig. 4b**).

217 Analysis of TF binding to lig147 revealed several types of positional preference (**Fig.**  
218 **4a**), which we classified into three major classes (**Fig. 4a**): (1) End binders; these TFs tend to  
219 prefer positions towards the end of the ligand. All tested bZIP factors belong to this class  
220 (**Fig. 4b**), e.g., CEBPB (**Fig. 4c, Extended Data Fig. 5a**). This preference might be  
221 explained by the "breathing", i.e. the spontaneous partial detachment of nucleosomal  
222 DNA<sup>1,46,47</sup>, which occurs more frequently towards the entry and exit of nucleosomal DNA  
223 (**Fig. 4d**). (2) Periodic binders; these TFs tend to bind periodic positions on nucleosomal  
224 DNA. This periodicity is likely induced by the contacts of histones to DNA at 10-bp  
225 intervals. (3) Dyad binders; these TFs prefer to bind nucleosomal DNA near the dyad  
226 position. In addition to these three classes, we also identified a "mixed" class (**Fig. 4a**) where  
227 TFs show E-MI diagonal characteristics of both the end binder and the periodic binder class.  
228 TFs behaved consistently for lig147 and lig200 according to the binder classification  
229 (**Extended Data Fig. 5b**). Compared to the end binders, the periodic binders and dyad  
230 binders displayed deeper penetration of E-MI signals into the center of the ligands (**Extended**  
231 **Data Fig. 5b**); they are thus more capable to bind nucleosomal DNA.

### 232 **Binding at the outward-facing side of the DNA helix**

233 Half of the circumference of nucleosomal DNA is in close proximity of the histones.  
234 As DNA is helical, equivalent positions that could be accessible to TFs are thus located at  
235 ~10 bp intervals. Accordingly, we found that many TFs prefer to bind to positions located  
236 ~10 bp apart on nucleosomal DNA (**Fig. 4a, periodic binders**). We studied this effect using  
237 the lig147 libraries. By applying a Fast Fourier Transform (FFT) to the E-MI diagonals, we  
238 obtained the strength and phase of the ~10 bp periodicity for the TFs (**Fig. 5a**). The result  
239 shows that the overall periodicity of E-MI is stronger for the NCAP-SELEX library  
240 compared to the free-DNA HT-SELEX library (**Fig. 5a, bottom**). Due to the binding

241 specificity of nucleosome, an increased periodicity was also observed with the counts of  
242 dinucleotides (e.g. TA) along the ligand (**Extended Data Fig. 6a**). TA-enriched positions on  
243 nucleosomal DNA correspond to positions where histones contact DNA<sup>4,42</sup>, which are also  
244 positions where the DNA major groove is facing towards the solvent. The periodicity of TA  
245 for all experiments had a similar phase (**Extended Data Fig. 6a**), suggesting that in NCAP-  
246 SELEX, the nucleosomes reconstituted for all TFs shared a similar rotational position on the  
247 DNA ligand. In contrast, the phase of the E-MI periodicity is much more dispersed (**Fig. 5a**).  
248 This dispersion is consistent with the preference of TFs towards the minor and major grooves  
249 of DNA (**Fig. 5b, c**).

250 For example, PITX and EOMES prefer almost opposite phases of nucleosomal DNA  
251 (**Fig. 5a**), respectively in phase and out of phase with the TA dinucleotide (**Fig. 5b, c**; the  
252 heatmaps). Consistently, the structural analysis indicated their different groove preference:  
253 PITX contacts DNA principally by insertions into the major groove (structure in **Fig. 5b**)<sup>48</sup>,  
254 whereas the T-box TFs principally contact DNA via the minor groove (structure in **Fig. 5c**;  
255 see also the references<sup>49,50</sup>). Because the E-MI measure detects the most enriched 3-mer pairs,  
256 high E-MI signal usually occurs at positions that correspond to direct TF amino-acid to DNA  
257 contacts. Thus, TFs that bind to the major groove tend to show E-MI maximums in phase  
258 with TA, and TFs that bind to the minor groove commonly display E-MI maximums out of  
259 phase with TA, as seen in **Fig. 5b** and **5c**. Such patterns of TF binding minimize the steric  
260 conflict between TF and the histones (cartoon of TF-nucleosome complex in **Fig. 5b, c** and  
261 **Extended Data Fig. 6b**).

262 The periodic pattern of E-MI diagonal agrees with the motif matching result  
263 (**Extended Data Fig. 6c**). The periodic availability of DNA for TF binding also imposes a  
264 ~10 bp periodicity on dimer spacing patterns (**Extended Data Fig. 6d**) for individual TFs  
265 that can bind to the outward-facing DNA. However, in most cases such binding appears not  
266 to be cooperative, based on the fact that the observed frequency of ligands with two motifs  
267 can be well estimated by the frequency of ligands that contain only one motif (data not  
268 shown). Taken together, our results indicate TFs tend to bind to the outward-facing side of  
269 nucleosomal DNA, as expected from steric considerations.

## 270 **Binding near the nucleosomal dyad**

271 Analysis of the positional preference of TFs on nucleosomal DNA also revealed that  
272 the region around the nucleosomal dyad is strongly preferred by a few TFs. For example,  
273 RFX5 shows the strongest binding around the dyad position of lig147 (**Fig. 6a, Extended**  
274 **Data Fig. 7a**). Also, multiple SOX TFs show a preference for binding to DNA near the dyad  
275 (**Fig. 6b**). Distinct from other regions of nucleosomal DNA, the dyad region contains only a  
276 single DNA gyre (**Fig. 6c**), and the histone disk is thinnest there<sup>41,51</sup>. These features of the  
277 dyad DNA reduce the steric barrier for TF binding, and could allow TFs that bend DNA upon  
278 binding (such as SOX proteins<sup>52</sup>) to deform DNA relatively easily.

279 Binding of SOX11 to sites near the dyad of nucleosome was validated with  
280 Electrophoretic Mobility Shift Assay (EMSA). Nucleosomes containing a SOX11 binding  
281 sequence identified in the NCAP-SELEX experiment were incubated with increasing

282 amounts of purified SOX11 eDBD. The clear super-shift confirmed the binding of SOX11 to  
283 the nucleosome (**Fig. 6d**). The result also indicates that SOX11 does not dissociate the  
284 nucleosome upon binding.

## 285 **TFs and their binding positions differ in the ability to dissociate the** 286 **nucleosome**

287 To determine whether TF binding affects the stability of the nucleosome, we  
288 performed an additional affinity capture step to separate the nucleosome-bound and  
289 dissociated DNA (unbound) after the last NCAP-SELEX cycle (**Fig. 1a**; lig147). As a control  
290 experiment, we also allowed the last-cycle nucleosome to dissociate without the presence of  
291 TFs. TFs whose binding leads to nucleosome dissociation are expected to have more and  
292 stronger binding sites in the unbound library compared to the bound library. Conversely, TFs  
293 that stabilize the nucleosome will show the reverse. To evaluate each TF's effect on the  
294 stability of the nucleosome, the differential E-MI between its bound and unbound libraries  
295 was calculated. Control experiments lacking TFs showed very little effect (**Extended Data**  
296 **Fig. 8a**), whereas in the presence of TFs, clear differences in E-MI signals were observed  
297 (**Fig. 7a** and **Extended Data Fig. 8a**). We found that most TFs (e.g. CDX1) have stronger E-  
298 MI in the unbound library compared to that of the bound library (**Fig. 7a, b**), suggesting that  
299 they can facilitate nucleosome dissociation upon binding. However, we also identified a few  
300 exceptional TFs whose binding stabilized the nucleosome. These include the T-box TFs, such  
301 as TBX2. All three TBX2 replicates had higher E-MI in the bound library (**Fig. 7b**).

302 We also found several cases where different binding modes of the same TF could  
303 dissociate nucleosome with a different efficiency (**Extended Data Fig. 8b**). Moreover, many  
304 TFs' efficiency to dissociate nucleosome depended on the position of binding. In general, we  
305 observed that binding events close to the center of nucleosomal DNA more efficiently  
306 dissociated the nucleosome (**Fig. 7a** and **Extended Data Fig. 8a**). Interestingly, some TFs  
307 could both stabilize and destabilize nucleosome in a position-dependent way. Most of them  
308 tend to facilitate the dissociation of nucleosome when bound close to the center of the  
309 nucleosomal DNA, and stabilize the nucleosome when bound to the ends (**Fig. 7a**, brackets).  
310 It is possible that TFs bound close to the ends could decrease the DNA flexibility there and  
311 subsequently disfavor the dissociation of DNA ends from the histones, which in turn  
312 contributes to nucleosome stability. More specifically, some ETS members decrease in their  
313 efficiency to dissociate nucleosome or even stabilize nucleosome when they bind very close  
314 to the dyad (e.g. the ETV factors and ERG, asterisks in **Fig. 7a**, see also **Fig. 7c**).

## 315 **DISCUSSION**

316 It is well established that TFs compete with nucleosomes for available genomic DNA  
317 sequences, and that this competition has a major influence on gene expression. Although the  
318 DNA binding specificities of many TFs and the nucleosome itself are relatively well  
319 characterized<sup>38,42,43,53-60</sup>, there is little information on how the nucleosome affects TF binding.  
320 In this study, we developed a new method, NCAP-SELEX, for analysis of nucleosome-TF  
321 interactions and systematically examined 220 TFs' binding preference on nucleosomal DNA.



322 To identify the binding patterns, we used a mutual-information-based method that can detect  
323 enrichment of any sequence pattern along the nucleosomal DNA. This analysis, combined  
324 with motif matching, identified five major interaction patterns between TFs and the  
325 nucleosome (**Fig. 7d**). The interaction modes include (1) binding spanning both of the two  
326 gyres of nucleosomal DNA; (2) orientational preference; (3) end preference; (4) periodic  
327 binding; and (5) preferential binding to the dyad region of nucleosomal DNA. Together, these  
328 findings reveal a rich landscape of interactions between the two key regulators of genome  
329 structure and function—the nucleosome and the sequence-specific DNA binding proteins.

### 330 **Nucleosomes mask interaction surfaces on DNA**

331 Our results confirmed the previous view<sup>18</sup> that the nucleosome inhibits binding of  
332 almost all TFs to DNA. TFs and the nucleosome have long been considered to bind DNA in a  
333 mutually exclusive fashion<sup>30,61,62</sup>. However, only in a few individual cases has this prediction  
334 been validated using direct biochemical assays<sup>19,63</sup>. Here, we performed an NCAP-SELEX  
335 experiment that analyzes TF-nucleosome interactions in the absence of higher order effects,  
336 such as chromatin compaction, remodeling or histone modification, which may complicate  
337 analysis of the *in vivo* TF-nucleosome interactions. We find that for almost all TFs, less  
338 binding occurs in regions that have higher nucleosome occupancy (**Fig. 2a**). This result  
339 directly verifies the inhibitory role of the nucleosome. In addition, we observed that although  
340 differing in extent, most TFs prefer to bind nucleosomal DNA close to the entry and exit  
341 positions (**Fig. 4a**). This positional preference is in line with the probability of spontaneous  
342 dissociation (breathing) of nucleosomal DNA, which decreases from the end to the center<sup>64-</sup>  
343 <sup>66</sup>. Therefore, the end-binder class of TFs may only be able to bind to regions of DNA that are  
344 dissociated from the nucleosome.

345 Wrapping of DNA around the nucleosome results in masking of one side of the DNA  
346 helix, but leaves the other side accessible from solvent. Such masking results in a significant  
347 accessibility change along each period (~10.2 bp) of the nucleosomal DNA. Therefore, the  
348 nucleosome will directly sterically hinder TFs that bind to long motifs through a continuous  
349 interaction with the major or minor groove. In particular, this could block the binding of the  
350 C2H2 zinc fingers (**Fig. 4a**, see also the references<sup>26,54,55</sup>). In addition, strong steric hindrance  
351 will block binding of proteins that radially cover more than 180° of the DNA circumference.  
352 This may explain the observed end preference of, for example, the bZIP family and many  
353 bHLH factors (**Fig. 4**, see also the references<sup>26,67</sup>). Moreover, nucleosomal DNA is bent  
354 relatively sharply, which could impair TF-DNA contacts if TFs have evolved to specifically  
355 bind to free DNA.

356 However, we found that many TFs that bind to short motifs, or to discontinuous  
357 motifs, are still able to bind to nucleosomal DNA in a periodic pattern that corresponds to the  
358 helical periodicity of DNA. This periodicity was not observed on free DNA, indicating that  
359 the occlusion of specific positions by the nucleosome still allows TFs to occupy the  
360 remaining sites. Such periodic preference of binding has been reported previously for p53 and  
361 the glucocorticoid receptor<sup>68,69</sup>, but the prevalence and biochemical basis of this phenomenon  
362 was not clear.

### 363 **Nucleosome leads to asymmetric binding of TFs**

364 Our analysis identified many TFs such as ETS and CREB that have an orientational  
365 preference to nucleosome when binding nucleosomal DNA. The asymmetry is also observed  
366 for the MNase (**Fig. 3f, Extended Data Fig. 3e**) and DNase I<sup>70</sup> profiles around their *in vivo*  
367 binding sites. Such orientational preference is induced by the nucleosome, because the  
368 nucleosomal environment breaks the rotational symmetry of DNA. Asymmetric chromatin  
369 features have been extensively observed previously by many investigators. These include  
370 signatures like nucleosome occupancy<sup>71</sup>, chromatin accessibility<sup>70</sup>, histone modification<sup>71,72</sup>,  
371 and the nucleosome signatures<sup>73,74</sup>. As these features are a complex outcome of many active  
372 and passive cellular processes, the origin of the observed polarity has been unclear. Our  
373 results suggest that at least part of the observed asymmetry in chromatin features next to TF  
374 binding sites or across nucleosomes is the direct result of the fact that TFs can interact with  
375 the nucleosome in a preferred orientation. In addition, because many TFs, including  
376 canonical homeodomains, recognize a near-palindromic site even when they bind DNA  
377 asymmetrically, the orientational asymmetry is likely to be more pervasive than what was  
378 detected in this study.

### 379 **Nucleosome as a scaffold**

380 The nucleosome has DNA wrapped around it and acts as a scaffold, facilitating  
381 specific binding modes that would display very weak affinity on free DNA. A unique  
382 property of the nucleosomal DNA is that at most positions, two DNA gyres are parallel to  
383 each other. Moreover, the DNA grooves align across the two nucleosomal DNA gyres<sup>41</sup>. The  
384 parallel gyres could specifically associate with TF dimers, or TFs having long recognition  
385 helices or multiple DNA binding domains. Here, we found the T-box factors T and TBX2 are  
386 using this scaffold to bind nucleosomal DNA. Similar multi-gyre binding has previously been  
387 reported for synthetic DNA binder<sup>75</sup> and for large protein complexes involved in chromatin  
388 remodeling<sup>76,77</sup>. However, our results are the first demonstration of this mode of binding for  
389 sequence-specific DNA binding proteins. The dual-gyre binding is possible only on  
390 nucleosomal DNA, and it thus stabilizes the nucleosome from dissociation, and may therefore  
391 function to lock a nucleosome in place at a specific position.

392 In addition to the dual-gyre binding mode, we also identified several TFs that prefer  
393 to bind at or near the dyad axis. These included RFX5 and five SOX TFs. The dyad region of  
394 nucleosomal DNA differs from other nucleosomal DNA in three respects. First, the dyad  
395 region contains only a single DNA gyre and thus has a lower steric barrier for binding.  
396 Second, the histone disk of the nucleosome is thinnest near the dyad; this further reduces the  
397 steric barrier, and also allows TFs to deform the dyad DNA more easily due to a weaker  
398 interaction with histones; the higher deformability likely accounts for the dyad preference of  
399 SOXs, which bend DNA upon binding. Third, the entry and exit of nucleosomal DNA are  
400 also close to the dyad; together with the dyad DNA, they provide a scaffold for specific  
401 configurations of TFs. FoxA has been suggested to make use of this scaffold to achieve  
402 highly specific positioning close to the dyad<sup>20,78</sup>; this binding mode mimics that of the linker  
403 histones H1 and H5<sup>79</sup>. However, the dyad positioning of FoxA is not observed in this study

404 using eDBD, potentially because the full length of FoxA is required for its interaction with  
405 the nucleosome<sup>21</sup>.

406 Available sites on histones also contribute to part of the nucleosome scaffold. Many  
407 proteins bind nucleosomal DNA by contacting both the nucleosomal DNA and the histones,  
408 as evidenced for the chromatin remodelers and histone modifiers<sup>51,80,81</sup>. The additional  
409 contact with histones will allow proteins to bind nucleosomal DNA with a higher affinity  
410 than free DNA, and could also lead to functional histone distortions upon binding<sup>82</sup>. Further  
411 structural analyses are necessary to determine whether the positional preferences of, for  
412 example, SOXs and RFX5 are resulted from interactions with histone proteins, or are  
413 primarily driven by the more accessible nature of the dyad DNA.

#### 414 **Pioneer TFs and nucleosome binding**

415 Pioneer TFs are defined by their ability to bind nucleosomal DNA<sup>18</sup>. In many cases it  
416 is unclear whether such TFs prefer nucleosomal DNA over free DNA, or bind nucleosomal  
417 DNA only relatively better than non-pioneer TFs. It is noteworthy that TFs may also facilitate  
418 the access of nucleosomal DNA even without displacing the nucleosome, by competing with  
419 linker histones and maintaining nucleosome in an accessible conformation<sup>20</sup>. Such a  
420 mechanism requires a dyad preference. It is thus of particular interest to further examine the  
421 interaction of dyad binders with linker histones.

422 In NCAP-SELEX, we observed that for the eDBD of almost all TFs, including known  
423 pioneer factors such as FOX and SOX, binding to free DNA was preferred compared with  
424 their binding to nucleosomal DNA. This order of preference results in destabilization of the  
425 nucleosomes that are bound by the TFs by mass action. The different binding modes that we  
426 identified also differ in their potential for pioneer activity. Whereas end-binders are unable to  
427 effectively access nucleosomal DNA, a large fraction of nucleosome-bound DNA sequence  
428 will be accessible to the TFs in the periodic binder class. The dyad binders, in turn, can  
429 access only highly specific positions along the nucleosomal DNA. Moreover, some TFs have  
430 developed “pioneer modes” to bind nucleosomal DNA in a different way compared to their  
431 binding to free DNA. For example, the transcription factor T has its normal binding mode  
432 inhibited by nucleosome occupancy (**Fig. 3a, Extended Data Fig. 2a**). Nonetheless, its dual-  
433 gyre binding mode is only allowed on nucleosomal DNA. It is also possible that we did not  
434 identify some pioneer TFs, as additional domains in the full-length protein could be required  
435 for their high-affinity binding to the nucleosomal DNA. The ability of a large number of TFs  
436 to access different positions along the nucleosomal DNA indicates that nucleosomes at  
437 different genomic positions are accessible to different classes of TFs, leading to a complex  
438 interplay between the DNA sequence, nucleosome positions, and the TF content of a cell.

#### 439 **Dissociating the nucleosome**

440 The binding of pioneer factors does not necessarily dissociate the nucleosome. But  
441 their ability to dissociate nucleosomes is linked to their tendency to open chromatin and to  
442 activate transcription. For the libraries enriched by each TF, we examined if the nucleosome  
443 is dissociated by comparing the bound and unbound libraries of cycle five. In accord with the

444 mutually exclusive nature between TF and nucleosome binding, most TFs facilitated the  
445 dissociation of nucleosomes. In cells, these TFs are predicted to act passively to dissociate  
446 nucleosomes, by having a moderate affinity towards nucleosomal DNA, and high affinity  
447 towards free DNA. This mechanism provides favorable kinetics as binding would not require  
448 prior dissociation of the nucleosome, and also contributes free energy for displacing the  
449 nucleosome. These TFs are thereby potential activators that can open chromatin and regulate  
450 gene expression.

451 Some TFs, in turn, stabilized the nucleosome. These factors could act to repress gene  
452 expression, or to precisely position nucleosomes at specific genomic loci. However, in cells,  
453 they might also potentially activate an enzymatic process that leads to dissociation,  
454 displacement or remodeling of the nucleosome. Moreover, we also observed TFs that both  
455 stabilize and destabilize nucleosomal DNA depending on their relative position of binding.  
456 Such ability could be used to more precisely position local nucleosomes.

457 TFs and the nucleosome are central elements regulating eukaryotic gene expression.  
458 In this work, we have systematically analyzed the ability of TFs to bind to and to dissociate  
459 the nucleosome. The results revealed five distinct modes of TF-nucleosome interactions,  
460 including a symmetry-breaking effect induced by the nucleosomal context that is likely to  
461 contribute to the extensively observed asymmetric environment around gene regulatory  
462 elements. In addition, we discovered major differences in the ability of specific TFs to bind to  
463 and open nucleosomal DNA. The identified binding modes explain in part the complexity of  
464 the relationship between sequence and gene expression in eukaryotes, and provide a basis for  
465 future studies aimed at understanding transcriptional regulation based on biochemical  
466 principles.

467

## 468 REFERENCES

- 469 1 Andrews, A. J. & Luger, K. Nucleosome structure(s) and stability: variations on a  
470 theme. *Annu. Rev. Biophys.* **40**, 99-117 (2011).
- 471 2 Segal, E. & Widom, J. What controls nucleosome positions? *Trends Genet.* **25**, 335-  
472 343 (2009).
- 473 3 Richmond, T. J. & Davey, C. A. The structure of DNA in the nucleosome core. *Nature*  
474 **423**, 145-150 (2003).
- 475 4 McGinty, R. K. & Tan, S. Nucleosome structure and function. *Chem. Rev.* **115**, 2255-  
476 2273 (2015).
- 477 5 Valouev, A. *et al.* Determinants of nucleosome organization in primary human cells.  
478 *Nature* **474**, 516-520 (2011).
- 479 6 Wang, J. P. *et al.* Preferentially quantized linker DNA lengths in *Saccharomyces*  
480 *cerevisiae*. *PLoS Comput. Biol.* **4**, e1000175 (2008).
- 481 7 Felsenfeld, G. & Groudine, M. Controlling the double helix. *Nature* **421**, 448-453  
482 (2003).
- 483 8 Jin, J. *et al.* Synergistic action of RNA polymerases in overcoming the nucleosomal  
484 barrier. *Nat. Struct. Mol. Biol.* **17**, 745-752 (2010).
- 485 9 Natarajan, A., Yardimci, G. G., Sheffield, N. C., Crawford, G. E. & Ohler, U.  
486 Predicting cell-type-specific gene expression from regions of open chromatin.  
487 *Genome Res.* **22**, 1711-1722 (2012).

- 488 10 Raveh-Sadka, T. *et al.* Manipulating nucleosome disfavoring sequences allows fine-  
489 tune regulation of gene expression in yeast. *Nat. Genet.* **44**, 743-750 (2012).
- 490 11 Teves, S. S., Weber, C. M. & Henikoff, S. Transcribing through the nucleosome.  
491 *Trends Biochem. Sci.* **39**, 577-586 (2014).
- 492 12 Kireeva, M. L. *et al.* Nucleosome remodeling induced by RNA polymerase II: Loss of  
493 the H2A/H2B dimer during transcription. *Mol. Cell* **9**, 541-552 (2002).
- 494 13 Hartzog, G. A. Transcription elongation by RNA polymerase II. *Curr. Opin. Genet.*  
495 *Dev.* **13**, 119-126 (2003).
- 496 14 Weber, C. M., Ramachandran, S. & Henikoff, S. Nucleosomes are context-specific,  
497 H2A.Z-modulated barriers to RNA polymerase. *Mol. Cell* **53**, 819-830 (2014).
- 498 15 Gross, D. S. & Garrard, W. T. Nuclease hypersensitive sites in chromatin. *Annu. Rev.*  
499 *Biochem.* **57**, 159-197 (1988).
- 500 16 Thurman, R. E. *et al.* The accessible chromatin landscape of the human genome.  
501 *Nature* **489**, 75-82 (2012).
- 502 17 Neph, S. *et al.* An expansive human regulatory lexicon encoded in transcription factor  
503 footprints. *Nature* **489**, 83-90 (2012).
- 504 18 Zaret, K. S. & Mango, S. E. Pioneer transcription factors, chromatin dynamics, and  
505 cell fate control. *Curr. Opin. Genet. Dev.* **37**, 76-81 (2016).
- 506 19 Sekiya, T., Muthurajan, U. M., Luger, K., Tulin, A. V. & Zaret, K. S. Nucleosome-  
507 binding affinity as a primary determinant of the nuclear mobility of the pioneer  
508 transcription factor FoxA. *Genes Dev.* **23**, 804-809 (2009).
- 509 20 Iwafuchi-Doi, M. *et al.* The pioneer transcription factor FoxA maintains an accessible  
510 nucleosome configuration at enhancers for tissue-specific gene activation. *Mol. Cell*  
511 **62**, 79-91 (2016).
- 512 21 Cirillo, L. A. *et al.* Opening of compacted chromatin by early developmental  
513 transcription factors HNF3 (FoxA) and GATA-4. *Mol. Cell* **9**, 279-289 (2002).
- 514 22 Hsu, H. T. *et al.* Recruitment of RNA polymerase II by the pioneer transcription factor  
515 PHA-4. *Science* **348**, 1372-1376 (2015).
- 516 23 Iwafuchi-Doi, M. & Zaret, K. S. Cell fate control by pioneer transcription factors.  
517 *Development* **143**, 1833-1837 (2016).
- 518 24 Iwafuchi-Doi, M. & Zaret, K. S. Pioneer transcription factors in cell reprogramming.  
519 *Genes Dev.* **28**, 2679-2692 (2014).
- 520 25 Cirillo, L. A. *et al.* Binding of the winged-helix transcription factor HNF3 to a linker  
521 histone site on the nucleosome. *EMBO J.* **17**, 244-254 (1998).
- 522 26 Soufi, A. *et al.* Pioneer transcription factors target partial DNA motifs on nucleosomes  
523 to initiate reprogramming. *Cell* **161**, 555-568 (2015).
- 524 27 Segal, E., Raveh-Sadka, T., Schroeder, M., Unnerstall, U. & Gaul, U. Predicting  
525 expression patterns from regulatory sequence in *Drosophila* segmentation. *Nature*  
526 **451**, 535-540 (2008).
- 527 28 Polach, K. J. & Widom, J. A model for the cooperative binding of eukaryotic  
528 regulatory proteins to nucleosomal target sites. *J. Mol. Biol.* **258**, 800-812 (1996).
- 529 29 Wasson, T. & Hartemink, A. J. An ensemble model of competitive multi-factor binding  
530 of the genome. *Genome Res.* **19**, 2101-2112 (2009).
- 531 30 Mirny, L. A. Nucleosome-mediated cooperativity between transcription factors. *Proc.*  
532 *Natl. Acad. Sci. U.S.A.* **107**, 22534-22539 (2010).
- 533 31 Kazemian, M., Pham, H., Wolfe, S. A., Brodsky, M. H. & Sinha, S. Widespread  
534 evidence of cooperative DNA binding by transcription factors in *Drosophila*  
535 development. *Nucleic Acids Res.* **41**, 8237-8252 (2013).
- 536 32 Vashee, S., Melcher, K., Ding, W. V., Johnston, S. A. & Kodadek, T. Evidence for two  
537 modes of cooperative DNA binding in vivo that do not involve direct protein-protein  
538 interactions. *Curr. Biol.* **8**, 452-458 (1998).
- 539 33 Moyle-Heyrman, G., Tims, H. S. & Widom, J. Structural constraints in collaborative  
540 competition of transcription factors against the nucleosome. *J. Mol. Biol.* **412**, 634-  
541 646 (2011).

- 542 34 Boyer, L. A. *et al.* Core transcriptional regulatory circuitry in human embryonic stem  
543 cells. *Cell* **122**, 947-956 (2005).
- 544 35 Roy, S. *et al.* Identification of functional elements and regulatory circuits by  
545 *Drosophila* modENCODE. *Science* **330**, 1787-1797 (2010).
- 546 36 Stanojevic, D., Small, S. & Levine, M. Regulation of a segmentation stripe by  
547 overlapping activators and repressors in the *Drosophila* embryo. *Science* **254**, 1385-  
548 1387 (1991).
- 549 37 Yan, J. *et al.* Transcription factor binding in human cells occurs in dense clusters  
550 formed around cohesin anchor sites. *Cell* **154**, 801-813 (2013).
- 551 38 Jolma, A. *et al.* DNA-dependent formation of transcription factor pairs alters their  
552 binding specificity. *Nature* **527**, 384-388 (2015).
- 553 39 Dyer, P. N. *et al.* Reconstitution of nucleosome core particles from recombinant  
554 histones and DNA. *Methods Enzymol.* **375**, 23-44 (2004).
- 555 40 Satchwell, S. C., Drew, H. R. & Travers, A. A. Sequence periodicities in chicken  
556 nucleosome core DNA. *J. Mol. Biol.* **191**, 659-675 (1986).
- 557 41 Luger, K., Mader, A. W., Richmond, R. K., Sargent, D. F. & Richmond, T. J. Crystal  
558 structure of the nucleosome core particle at 2.8 Å resolution. *Nature* **389**, 251-260  
559 (1997).
- 560 42 Struhl, K. & Segal, E. Determinants of nucleosome positioning. *Nat. Struct. Mol. Biol.*  
561 **20**, 267-273 (2013).
- 562 43 Brogaard, K., Xi, L. Q., Wang, J. P. & Widom, J. A map of nucleosome positions in  
563 yeast at base-pair resolution. *Nature* **486**, 496-501 (2012).
- 564 44 Vaquerizas, J. M., Kummerfeld, S. K., Teichmann, S. A. & Luscombe, N. M. A  
565 census of human transcription factors: function, expression and evolution. *Nat. Rev.*  
566 *Genet.* **10**, 252-263 (2009).
- 567 45 Henikoff, J. G., Belsky, J. A., Krassovsky, K., MacAlpine, D. M. & Henikoff, S.  
568 Epigenome characterization at single base-pair resolution. *Proc. Natl. Acad. Sci.*  
569 *U.S.A.* **108**, 18318-18323 (2011).
- 570 46 Isaac, R. S. *et al.* Nucleosome breathing and remodeling constrain CRISPR-Cas9  
571 function. *Elife* **5**, e13450 (2016).
- 572 47 Poirier, M. G., Bussiek, M., Langowski, J. & Widom, J. Spontaneous access to DNA  
573 target sites in folded chromatin fibers. *J. Mol. Biol.* **379**, 772-786 (2008).
- 574 48 Chaney, B. A., Clark-Baldwin, K., Dave, V., Ma, J. & Rance, M. Solution structure of  
575 the k50 class homeodomain PITX2 bound to DNA and implications for mutations that  
576 cause Rieger syndrome. *Biochemistry* **44**, 7497-7511 (2005).
- 577 49 Stirnimann, C. U., Ptchelkine, D., Grimm, C. & Muller, C. W. Structural basis of  
578 TBX5-DNA recognition: the T-Box domain in its DNA-bound and -unbound form. *J.*  
579 *Mol. Biol.* **400**, 71-81 (2010).
- 580 50 Coll, M., Seidman, J. G. & Muller, C. W. Structure of the DNA-bound T-box domain of  
581 human TBX3, a transcription factor responsible for ulnar-mammary syndrome.  
582 *Structure* **10**, 343-356 (2002).
- 583 51 McGinty, R. K. & Tan, S. Recognition of the nucleosome by chromatin factors and  
584 enzymes. *Curr. Opin. Struct. Biol.* **37**, 54-61 (2016).
- 585 52 Privalov, P. L., Dragan, A. I. & Crane-Robinson, C. The cost of DNA bending. *Trends*  
586 *Biochem. Sci.* **34**, 464-470 (2009).
- 587 53 Badis, G. *et al.* Diversity and complexity in DNA recognition by transcription factors.  
588 *Science* **324**, 1720-1723 (2009).
- 589 54 Yin, Y. *et al.* Impact of cytosine methylation on DNA binding specificities of human  
590 transcription factors. *Science* **356**, eaaj2239 (2017).
- 591 55 Jolma, A. *et al.* DNA-binding specificities of human transcription factors. *Cell* **152**,  
592 327-339 (2013).
- 593 56 Hughes, A. L. & Rando, O. J. Mechanisms underlying nucleosome positioning in  
594 vivo. *Annu. Rev. Biophys.* **43**, 41-63 (2014).
- 595 57 Radman-Livaja, M. & Rando, O. J. Nucleosome positioning: how is it established,  
596 and why does it matter? *Dev. Biol.* **339**, 258-266 (2010).

- 597 58 Fernandez, A. G. & Anderson, J. N. Nucleosome positioning determinants. *J. Mol.*  
598 *Biol.* **371**, 649-668 (2007).
- 599 59 Kaplan, N. *et al.* The DNA-encoded nucleosome organization of a eukaryotic  
600 genome. *Nature* **458**, 362-366 (2009).
- 601 60 Olson, W. K. & Zhurkin, V. B. Working the kinks out of nucleosomal DNA. *Curr. Opin.*  
602 *Struct. Biol.* **21**, 348-357 (2011).
- 603 61 Ramachandran, S. & Henikoff, S. Transcriptional regulators compete with  
604 nucleosomes post-replication. *Cell* **165**, 580-592 (2016).
- 605 62 Li, M. *et al.* Dynamic regulation of transcription factors by nucleosome remodeling.  
606 *Elife* **4**, e06249 (2015).
- 607 63 Hayes, J. J. & Wolffe, A. P. Histones H2A/H2B inhibit the interaction of transcription  
608 factor IIIA with the *Xenopus borealis* somatic 5S RNA gene in a nucleosome. *Proc.*  
609 *Natl. Acad. Sci. U.S.A.* **89**, 1229-1233 (1992).
- 610 64 Polach, K. J. & Widom, J. Mechanism of protein access to specific DNA sequences  
611 in chromatin: a dynamic equilibrium model for gene regulation. *J. Mol. Biol.* **254**, 130-  
612 149 (1995).
- 613 65 Anderson, J. D. & Widom, J. Sequence and position-dependence of the equilibrium  
614 accessibility of nucleosomal DNA target sites. *J. Mol. Biol.* **296**, 979-987 (2000).
- 615 66 Li, G., Levitus, M., Bustamante, C. & Widom, J. Rapid spontaneous accessibility of  
616 nucleosomal DNA. *Nat. Struct. Mol. Biol.* **12**, 46-53 (2005).
- 617 67 Jones, S. An overview of the basic helix-loop-helix proteins. *Genome Biol.* **5**, 226  
618 (2004).
- 619 68 Cui, F. & Zhurkin, V. B. Rotational positioning of nucleosomes facilitates selective  
620 binding of p53 to response elements associated with cell cycle arrest. *Nucleic Acids*  
621 *Res.* **42**, 836-847 (2014).
- 622 69 Li, Q. & Wrangé, O. Accessibility of a glucocorticoid response element in a  
623 nucleosome depends on its rotational positioning. *Mol. Cell. Biol.* **15**, 4375-4384  
624 (1995).
- 625 70 Sherwood, R. I. *et al.* Discovery of directional and nondirectional pioneer transcription  
626 factors by modeling DNase profile magnitude and shape. *Nat. Biotechnol.* **32**, 171-  
627 178 (2014).
- 628 71 Kundaje, A. *et al.* Ubiquitous heterogeneity and asymmetry of the chromatin  
629 environment at regulatory elements. *Genome Res.* **22**, 1735-1747 (2012).
- 630 72 Dunham, I. *et al.* An integrated encyclopedia of DNA elements in the human genome.  
631 *Nature* **489**, 57-74 (2012).
- 632 73 Gonzalez, S. *et al.* Nucleosomal signatures impose nucleosome positioning in coding  
633 and noncoding sequences in the genome. *Genome Res.* **26**, 1532-1543 (2016).
- 634 74 Quintales, L., Soriano, I., Vazquez, E., Segurado, M. & Antequera, F. A species-  
635 specific nucleosomal signature defines a periodic distribution of amino acids in  
636 proteins. *Open Biology* **5**, 140218 (2015).
- 637 75 Edayathumangalam, R. S., Weyermann, P., Gottesfeld, J. M., Dervan, P. B. & Luger,  
638 K. Molecular recognition of the nucleosomal "supergroove". *Proc. Natl. Acad. Sci.*  
639 *U.S.A.* **101**, 6864-6869 (2004).
- 640 76 Richmond, T. J. Nucleosome recognition and spacing by chromatin remodelling  
641 factor ISW1a. *Biochem. Soc. Trans.* **40**, 347-350 (2012).
- 642 77 Nodelman, I. M. *et al.* Interdomain communication of the Chd1 chromatin remodeler  
643 across the DNA gyres of the nucleosome. *Mol. Cell* **65**, 447-459 (2017).
- 644 78 Ye, Z. Q. *et al.* Genome-wide analysis reveals positional-nucleosome-oriented  
645 binding pattern of pioneer factor FOXA1. *Nucleic Acids Res.* **44**, 7540-7554 (2016).
- 646 79 Bednar, J. *et al.* Structure and dynamics of a 197 bp nucleosome in complex with  
647 linker histone H1. *Mol. Cell* **66**, 384-397 (2017).
- 648 80 Makde, R. D., England, J. R., Yennawar, H. P. & Tan, S. Structure of RCC1  
649 chromatin factor bound to the nucleosome core particle. *Nature* **467**, 562-566 (2010).

- 650 81 Armache, K. J., Garlick, J. D., Canzio, D., Narlikar, G. J. & Kingston, R. E. Structural  
651 basis of silencing: Sir3 BAH domain in complex with a nucleosome at 3.0 Å  
652 resolution. *Science* **334**, 977-982 (2011).
- 653 82 Sinha, K. K., Gross, J. D. & Narlikar, G. J. Distortion of histone octamer core  
654 promotes nucleosome mobilization by a chromatin remodeler. *Science* **355**,  
655 eaaa3761 (2017).
- 656 83 Sagendorf, J. M., Berman, H. M. & Rohs, R. DNAProDB: an interactive tool for  
657 structural analysis of DNA-protein complexes. *Nucleic Acids Res.*, doi:  
658 10.1093/nar/gkx1272 (2017).
- 659 84 Zhang, J. J., Kobert, K., Flouri, T. & Stamatakis, A. PEAR: a fast and accurate  
660 Illumina Paired-End reAd mergeR. *Bioinformatics* **30**, 614-620 (2014).
- 661 85 Gu, Z., Gu, L., Eils, R., Schlesner, M. & Brors, B. *circIize* Implements and enhances  
662 circular visualization in R. *Bioinformatics* **30**, 2811-2812 (2014).
- 663 86 Korhonen, J., Martinmaki, P., Pizzi, C., Rastas, P. & Ukkonen, E. MOODS: fast  
664 search for position weight matrix matches in DNA sequences. *Bioinformatics* **25**,  
665 3181-3182 (2009).
- 666 87 Pizzi, C., Rastas, P. & Ukkonen, E. Finding significant matches of position weight  
667 matrices in linear time. *IEEE/ACM Trans. Comput. Biol. Bioinform.* **8**, 69-79 (2011).
- 668 88 Nitta, K. R. *et al.* Conservation of transcription factor binding specificities across 600  
669 million years of bilateria evolution. *Elife* **4**, e04837 (2015).
- 670 89 Slattery, M. *et al.* Cofactor binding evokes latent differences in DNA binding  
671 specificity between Hox proteins. *Cell* **147**, 1270-1282 (2011).
- 672 90 Riley, T. R. *et al.* SELEX-seq: a method for characterizing the complete repertoire of  
673 binding site preferences for transcription factor complexes. *Methods Mol. Biol.* **1196**,  
674 255-278 (2014).
- 675 91 Mieczkowski, J. *et al.* MNase titration reveals differences between nucleosome  
676 occupancy and chromatin accessibility. *Nat. Commun.* **7**, 11485 (2016).
- 677 92 Li, H. & Durbin, R. Fast and accurate short read alignment with Burrows-Wheeler  
678 transform. *Bioinformatics* **25**, 1754-1760 (2009).
- 679 93 Lowary, P. T. & Widom, J. New DNA sequence rules for high affinity binding to  
680 histone octamer and sequence-directed nucleosome positioning. *J. Mol. Biol.* **276**,  
681 19-42 (1998).
- 682 94 Collings, C. K., Fernandez, A. G., Pitschka, C. G., Hawkins, T. B. & Anderson, J. N.  
683 Oligonucleotide sequence motifs as nucleosome positioning signals. *PLoS ONE* **5**,  
684 e10933 (2010).
- 685 95 Jolma, A. *et al.* Multiplexed massively parallel SELEX for characterization of human  
686 transcription factor binding specificities. *Genome Res.* **20**, 861-873 (2010).
- 687
- 688
- 689
- 690



691 **END NOTES**

692 **Supplementary Information** is linked to the online version of the paper at  
693 [www.nature.com/nature](http://www.nature.com/nature).

694

695 **Acknowledgments** We thank Biswajyoti Sahu, Fan Zhong, Kazuhiro Nitta, Arttu Jolma,  
696 Minna Taipale, Bei Wei, Jilin Zhang, Ekaterina Morgunova, and Jarkko Toivonen for their  
697 valuable suggestions. We thank Lijuan Hu, Jianping Liu, and Sandra Augsten for technical  
698 assistance. We thank the ENCODE Consortium and the ENCODE production laboratories for  
699 generating the ChIP-seq datasets. This work was supported by Center for Innovative  
700 Medicine at Karolinska Institutet, Knut and Alice Wallenberg Foundation, Göran Gustafsson  
701 Foundation and Vetenskapsrådet. P.C. was supported by the Deutsche  
702 Forschungsgemeinschaft (SFB860, SPP1935), the European Research Council Advanced  
703 Investigator Grant TRANSREGULON (grant agreement No 693023), and the Volkswagen  
704 Foundation.

705

706 **Author Contributions** J.T., F.Z. and P.C. conceived the experiments. F.Z. performed the  
707 NCAP-SELEX, MNase-seq and data analysis. L.F produced the histone octamers. Y.Y.  
708 helped with the curation and production of TF proteins. E.K. analysed the MNase-seq data.  
709 S.D. performed EMSA validation for SOX. F.J. and J.T. interpreted the data and wrote the  
710 manuscript. All authors discussed the findings and contributed to the manuscript.

711

712 **Author Information** All next generation sequencing data will be deposited to European  
713 Nucleotide Archive (ENA) under Accession PRJEB22684. All computer programs and  
714 scripts used are either published or available upon request. The authors declare no competing  
715 financial interests. Requests for materials should be addressed to J.T. ([jussi.taipale@ki.se](mailto:jussi.taipale@ki.se)).

716

717 **FIGURE LEGENDS**

Figure 1, Zhu et al. 2017

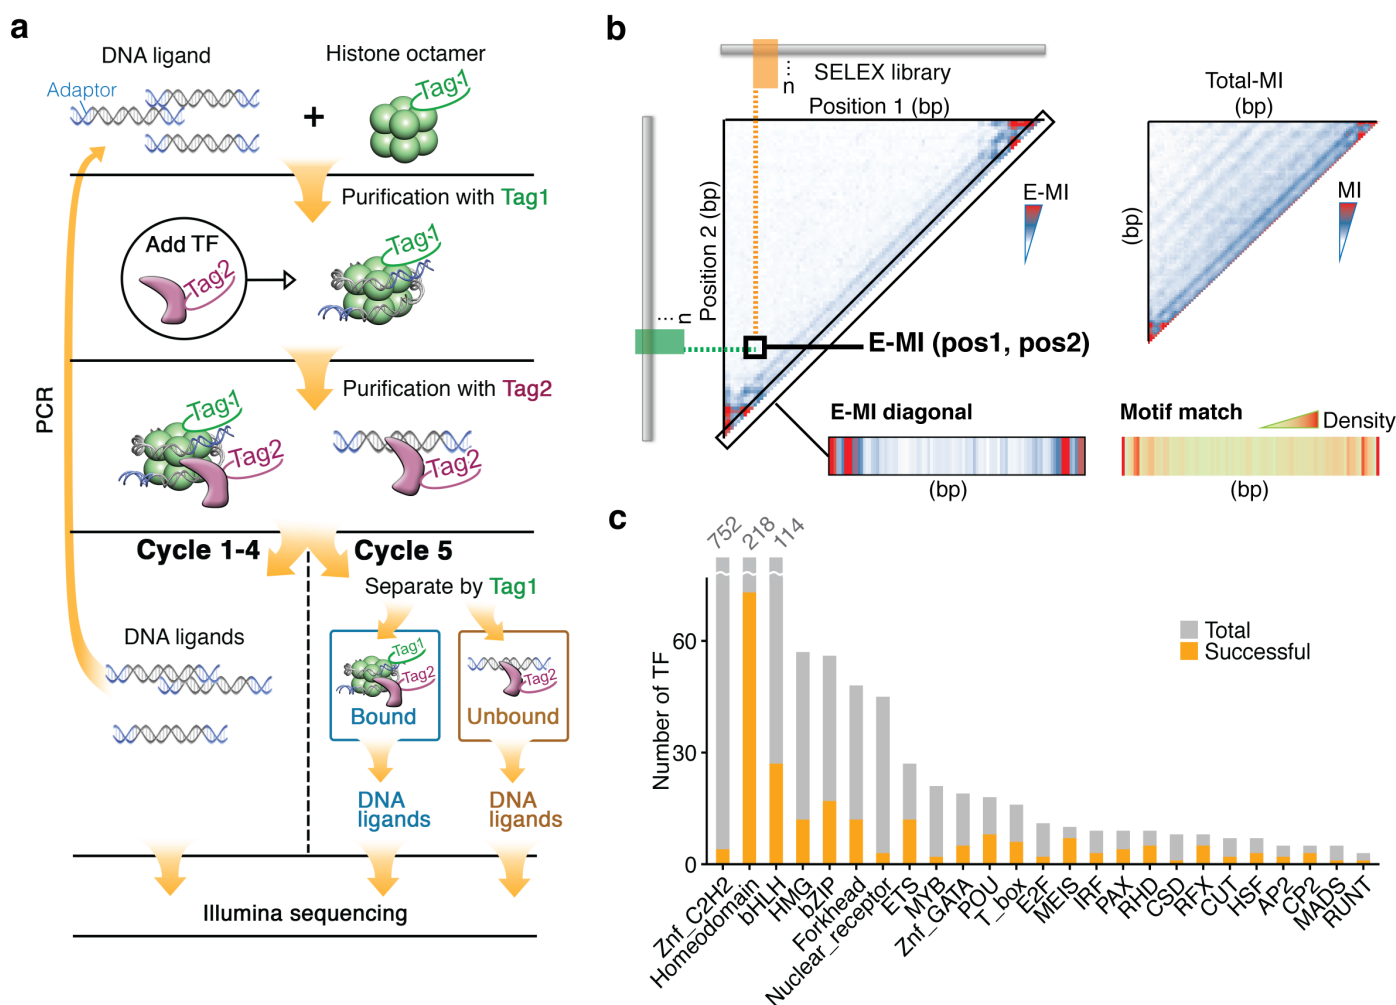

718

719 **Figure 1 | Nucleosome CAP-SELEX.** **a**, Schematic representation of NCAP-SELEX. The  
 720 DNA ligands for SELEX contain a randomized region (grey) with fixed adaptors (blue) at  
 721 both ends. The protocol first selects for ligands that are favored by the nucleosome, and then  
 722 from the nucleosome-bound ligand pool selects for ligands that bind to a given TF. The  
 723 orthogonal tagging of histone H2A (tag1) and TFs (tag2) enables the consecutive affinity  
 724 purification. In the last (5th) cycle, the TF-bound DNA ligands are further separated into  
 725 nucleosome-bound and unbound libraries. **b**, TF-signal analysis by E-MI. For the library  
 726 enriched by each TF, E-MI (Mutual Information between the most Enriched 3-mer pairs) is  
 727 calculated pairwise between all non-overlapping 3-mer columns (left triangle). When  
 728 analysing TF signals, we chose E-MI instead of total-MI (right triangle) because total-MI  
 729 detects also signals from the nucleosome (the stripes with 10-bp intervals). The diagonal of  
 730 the E-MI plot (bottom left) is most informative, and is generally in line with the motif-  
 731 matching result (bottom right). **c**, Family-wise coverage of successful TFs.

Figure 2, Zhu et al. 2017

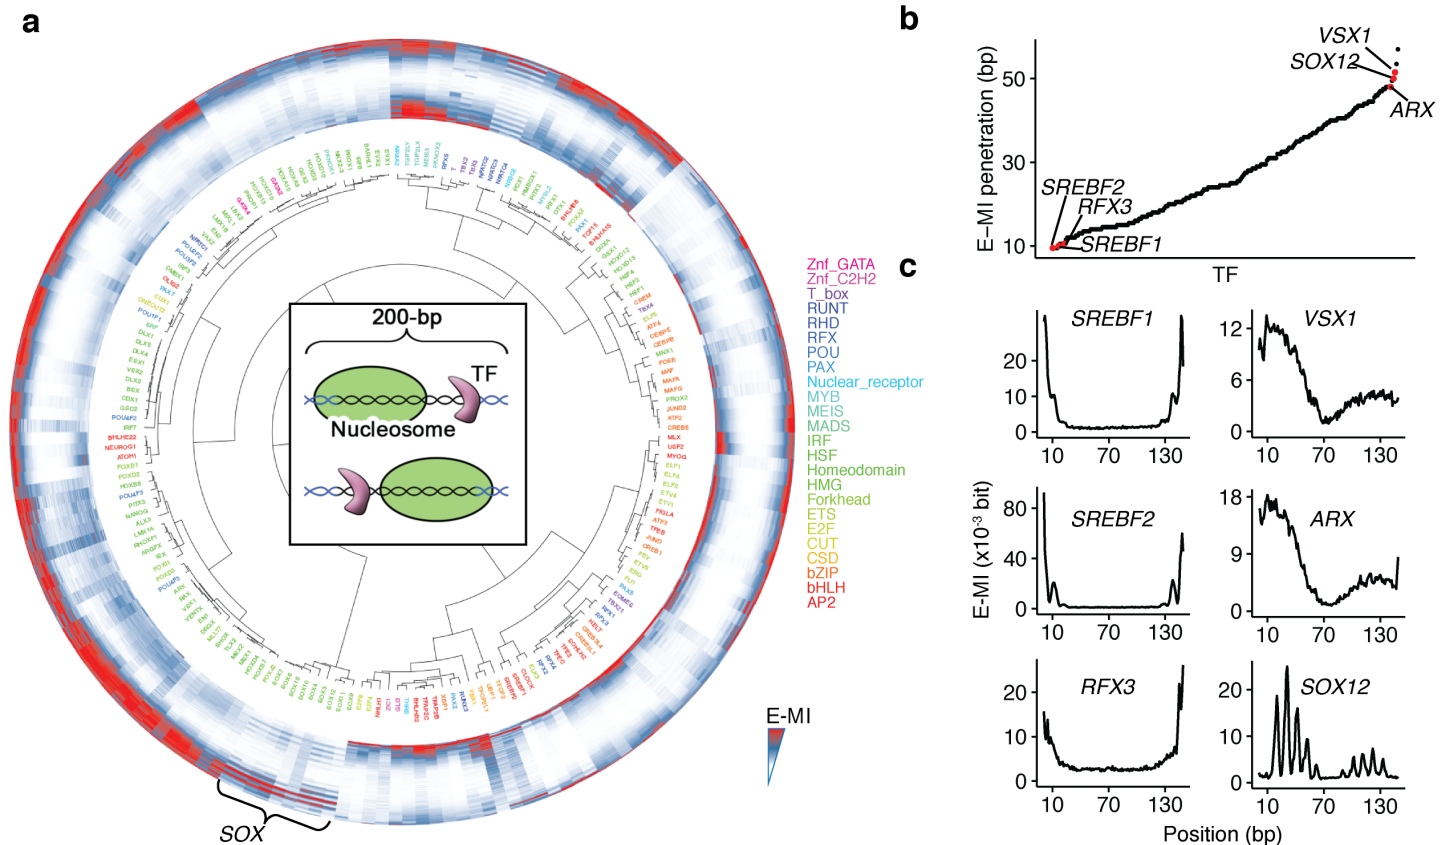

732

733 **Figure 2 | Nucleosomal DNA is less accessible for TFs than free DNA.** **a**, Hierarchical

734 clustering of the E-MI diagonals for NCAP-SELEX with the 200-bp ligand (lig200). The E-

735 MI diagonal for each TF is oriented radially. The names of the TFs are colored by family

736 with the coloring scheme indicated on the right. TFs from the same family tend to be

737 clustered together (e.g., SOX, indicated). The illustration at the center of the dendrogram

738 schematically represents TF's binding on lig200. Note that almost all TFs have lower E-MI

739 towards the center of lig200, indicating their lower affinity to nucleosomal DNA compared

740 with free DNA. The E-MI diagonals are scaled for each TF. **b**, E-MI penetration of individual

741 TFs on lig200. TFs are ordered according to their E-MI penetration depth towards the center

742 of the ligand. This order reflects TFs' ability to bind nucleosome-occupied DNA. Six TFs

743 representing either of the two extremes are colored red and exemplified in **(c)**. **c**, The

744 diagonal of E-MI for TFs with highest/lowest E-MI penetrations. Left: TFs with lowest E-MI

745 penetrations; right: TFs with highest E-MI penetrations.

746

Figure 3, Zhu et al. 2017

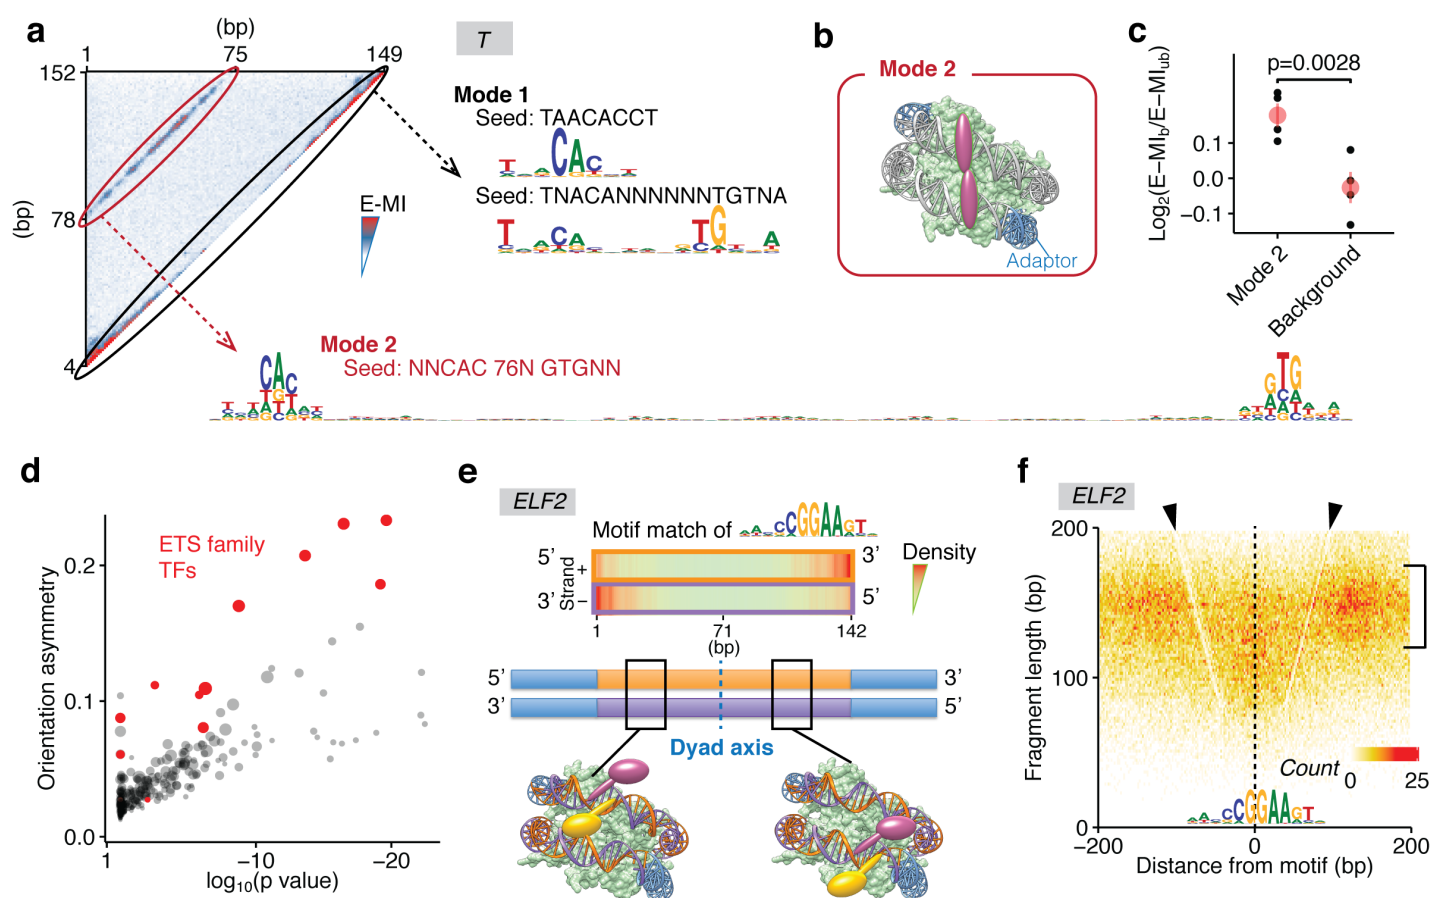

747

748 **Figure 3 | Nucleosome allows binding that spans two gyres and breaks the rotational**  
 749 **symmetry of DNA. a**, Two modes used by T (brachyury) to bind nucleosomal DNA. The  
 750 heatmap shows the pairwise E-MI for all combinations of positions on the 200-bp ligand. The  
 751 Mode 1 signal near the diagonal gives motifs similar to those seen on the free DNA. The  
 752 Mode 2 signal corresponds to a ~80-bp-long motif. Mode 1 is inhibited by higher nucleosome  
 753 occupancy towards the center whereas Mode 2 gets stronger in the middle. Seed for each  
 754 motif is also indicated. **b**, Schematic representation of TFs that bind the two gyres of  
 755 nucleosomal DNA at the same time. **c**, Mode 2 binding stabilizes nucleosome from  
 756 dissociation. Log<sub>2</sub> ratio of E-MI between the bound and unbound libraries (cycle five, four  
 757 replicates) of T is calculated for both the Mode 2 binding and the background E-MI level (see  
 758 **Method** for details). The bound library has stronger Mode 2 binding but similar background.  
 759 Each point indicates a replicate. Data are mean ± s.d.; two-sided t-test was used, 95% CI,  
 760 0.097–0.202. **d**, Orientational asymmetry of individual TFs. For each TF, the asymmetry is  
 761 evaluated by the binding energy difference between the two relative orientations, averaged  
 762 for 40 non-palindromic 8-mers that are most enriched in the TF's NCAP-SELEX library;  
 763 significance of the asymmetry is also tested to obtain the p value (see **Method** for details).  
 764 Most of the ETS-family TFs (red) show a prominent orientational asymmetry. Dot size  
 765 represents the extent of signal enrichment in each TF's NCAP-SELEX library. **e**, The  
 766 orientational asymmetry of ELF2. The ETS factor ELF2 has different motif density

767 distributions for the two strands of nucleosomal DNA (top panel). This is because at a  
768 specific position, TFs (magenta and yellow, bottom panel) that respectively bind to motifs on  
769 different DNA strands (purple and orange, blue for constant adaptor region) will differ in  
770 their surrounding chemical environments. For motifs that locate on different DNA strands  
771 and equidistant from the dyad, their chemical environment for binding will be identical due to  
772 the rotational symmetry of the nucleosome (with respect to the dyad axis), e.g., the magenta  
773 TF in the left model has the same chemical environment as the yellow TF in the right model.  
774 As a result, the motif densities on two DNA strands are different but symmetric to each other  
775 with regard to the dyad. **f**, The asymmetric MNase fragment profile around genomic ELF2  
776 sites. ELF2 motif matches within ChIP-seq peaks were positioned at the center. Nearby  
777 MNase fragment counts are summarized with  $2 \times 2$  bins according to their lengths and center  
778 positions. Nucleosome distribution near the ELF2 sites are reflected by the signal intensity of  
779 the  $\sim 150$  bp fragments (bracket). The V-shaped lines with a lower signal intensity  
780 (arrowheads) reveal the footprint of the TF, which is asymmetric.

Figure 4, Zhu et al. 2017

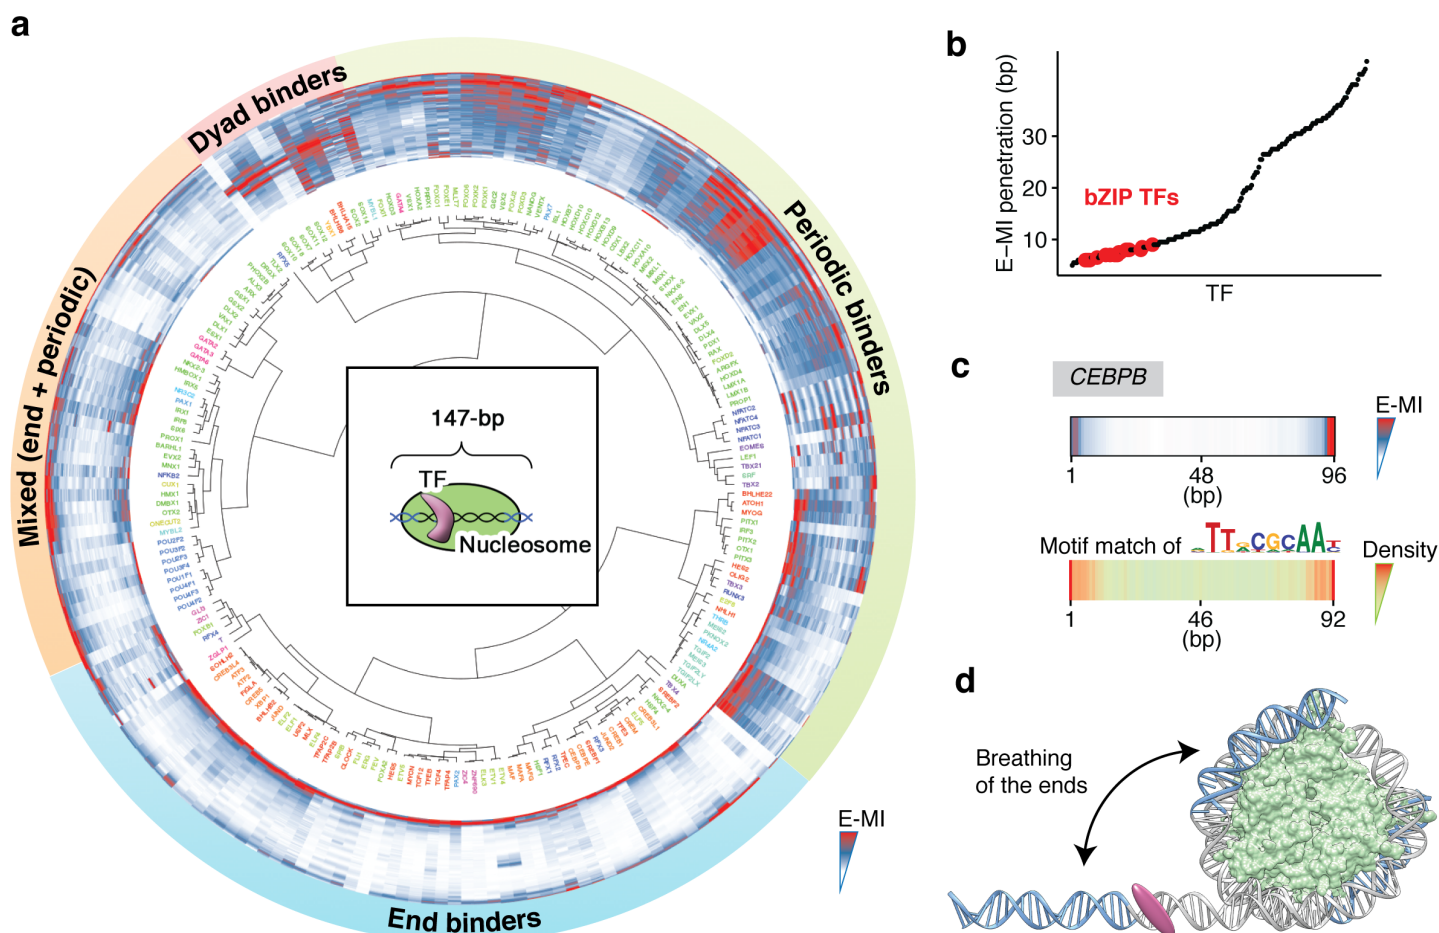

781

782 **Figure 4 | Nucleosome induces positional preference to TF binding.** **a**, Hierarchical  
 783 clustering of the E-MI diagonals for NCAP-SELEX with the 147-bp ligand (lig147). The  
 784 coloring scheme is the same as that in **Fig. 2a**. In the center of the dendrogram, the schematic  
 785 shows that nucleosome is positioned uniquely on lig147. TFs are assigned to three separate  
 786 classes and a mixed class. E-MI diagonal is scaled for each TF. **b**, E-MI penetration of each  
 787 TF on lig147. All examined bZIP TFs are marked with red. Their low penetrations indicate  
 788 an end preference. **c**, E-MI diagonal and motif matching results for the bZIP factor CEBPB.  
 789 **d**, Schematic representation showing a TF is preferring the ends of nucleosomal DNA due to  
 790 breathing. Both the two ends of nucleosomal DNA will breath but only one is illustrated here  
 791 for clarity.

Figure 5, Zhu et al. 2017

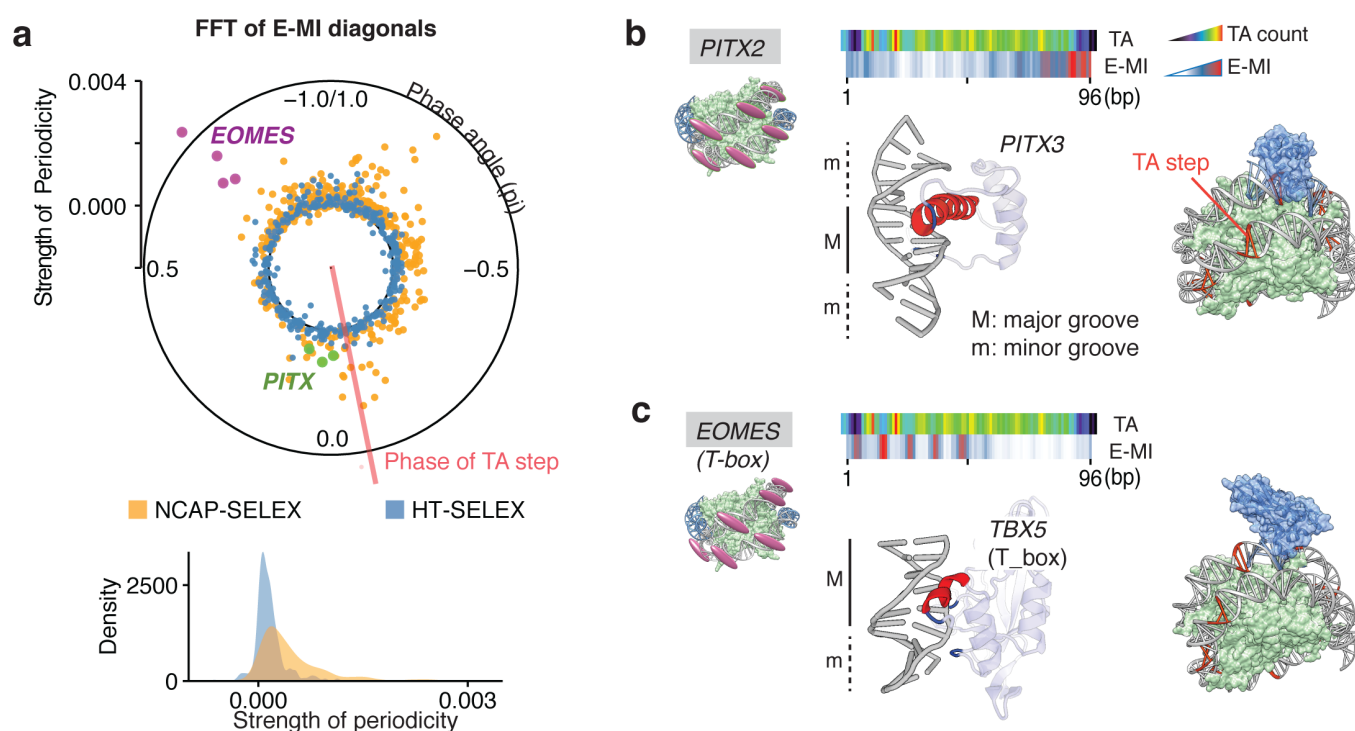

792

793 **Figure 5 | Periodic binding of TFs to the major or minor grooves facing outwards.**

794 **a**, Strength and phase of the ~10 bp periodicity for individual TFs. The polar plot shows the  
 795 strength and phase of the periodicity derived from the FFT of E-MI diagonals; data for both  
 796 the NCAP-SELEX (orange; nucleosomal DNA) and the HT-SELEX (blue; free DNA) are  
 797 shown. Each dot represents one SELEX library. EOMES (magenta, four replicates) and PITX  
 798 (green for PITX1, 2, 3) have opposite phases; they are exemplified in **(b, c)**. The phase of the  
 799 TA dinucleotide (red line, median value of all NCAP-SELEX libraries) is also shown to  
 800 indicate where histones contact nucleosomal DNA<sup>42</sup>. Bottom: density plot of the periodicity  
 801 strength for all TFs. **b**, Major groove binder prefers exposed major grooves on nucleosomal  
 802 DNA. The E-MI diagonal of PITX is in phase with the TA peaks along the ligand. The  
 803 structure of PITX (PDB 2lkx, visualized with DNaproDB<sup>83</sup>) also show contacts with DNA  
 804 principally in the major groove (M). The base-contacting helices (red) and loops (blue) are  
 805 indicated. Cartoon representation to the right shows that the steric hindrance is minimal when  
 806 PITX (blue) binds in phase with TA (orange) on the nucleosome structure (PDB 3ut9). **c**,  
 807 Minor groove binder prefers exposed minor grooves (m) on nucleosomal DNA. The E-MI  
 808 diagonal of EOMES (T-box) is out of phase with the TA peaks, suggesting it binds positions  
 809 where nucleosomal DNA's minor groove is facing outside. The TBX5 (T-box) structure  
 810 (PDB 2x6v) also shows contacts with DNA principally in the minor groove. Cartoon  
 811 representation to the right shows that the steric hindrance is minimal when TBX5 (blue) binds  
 812 out of phase with TA (orange) on the nucleosome structure (PDB 3ut9).

813

Figure 6, Zhu et al. 2017

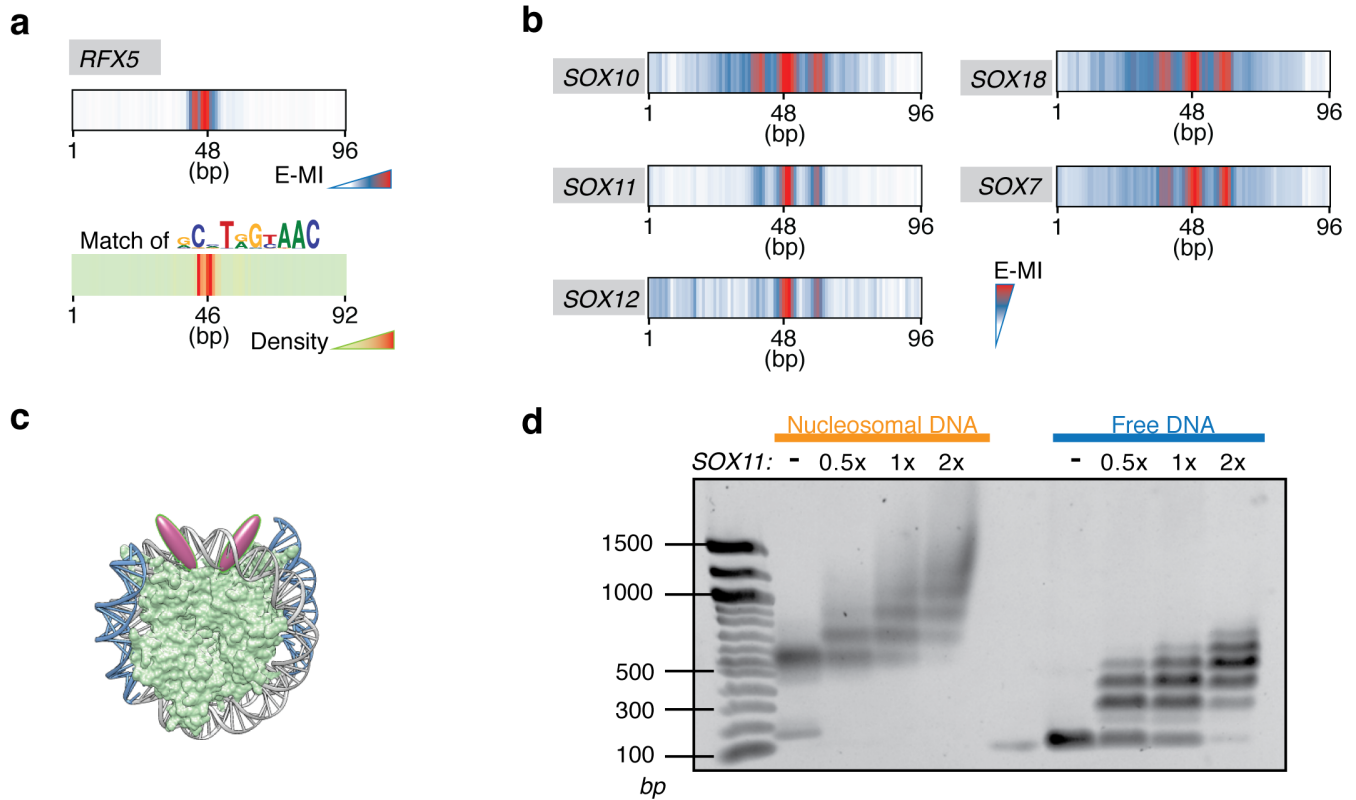

814

815 **Figure 6 | Binding near the dyad axis.** **a**, E-MI diagonal and motif matching results for  
816 RFX5. **b**, E-MI diagonal of SOX family TFs showing their preferred binding around the  
817 dyad. **c**, Schematic representation of TFs that prefer to bind around the dyad. **d**, EMSA of  
818 SOX11 complexes with nucleosome and with free DNA. Nucleosome is reconstituted and  
819 purified using a modified Widom 601 sequence, which contains a SOX11 binding sequence  
820 (extracted from cycle 4 SELEX library) embedded close to the dyad. Each 40  $\mu$ l reaction  
821 contains 1  $\mu$ g DNA, together with SOX11 protein at a molar ratio of 0, 0.5, 1, 2 (indicated on  
822 top of each lane) to DNA.

823



Figure 7, Zhu et al. 2017

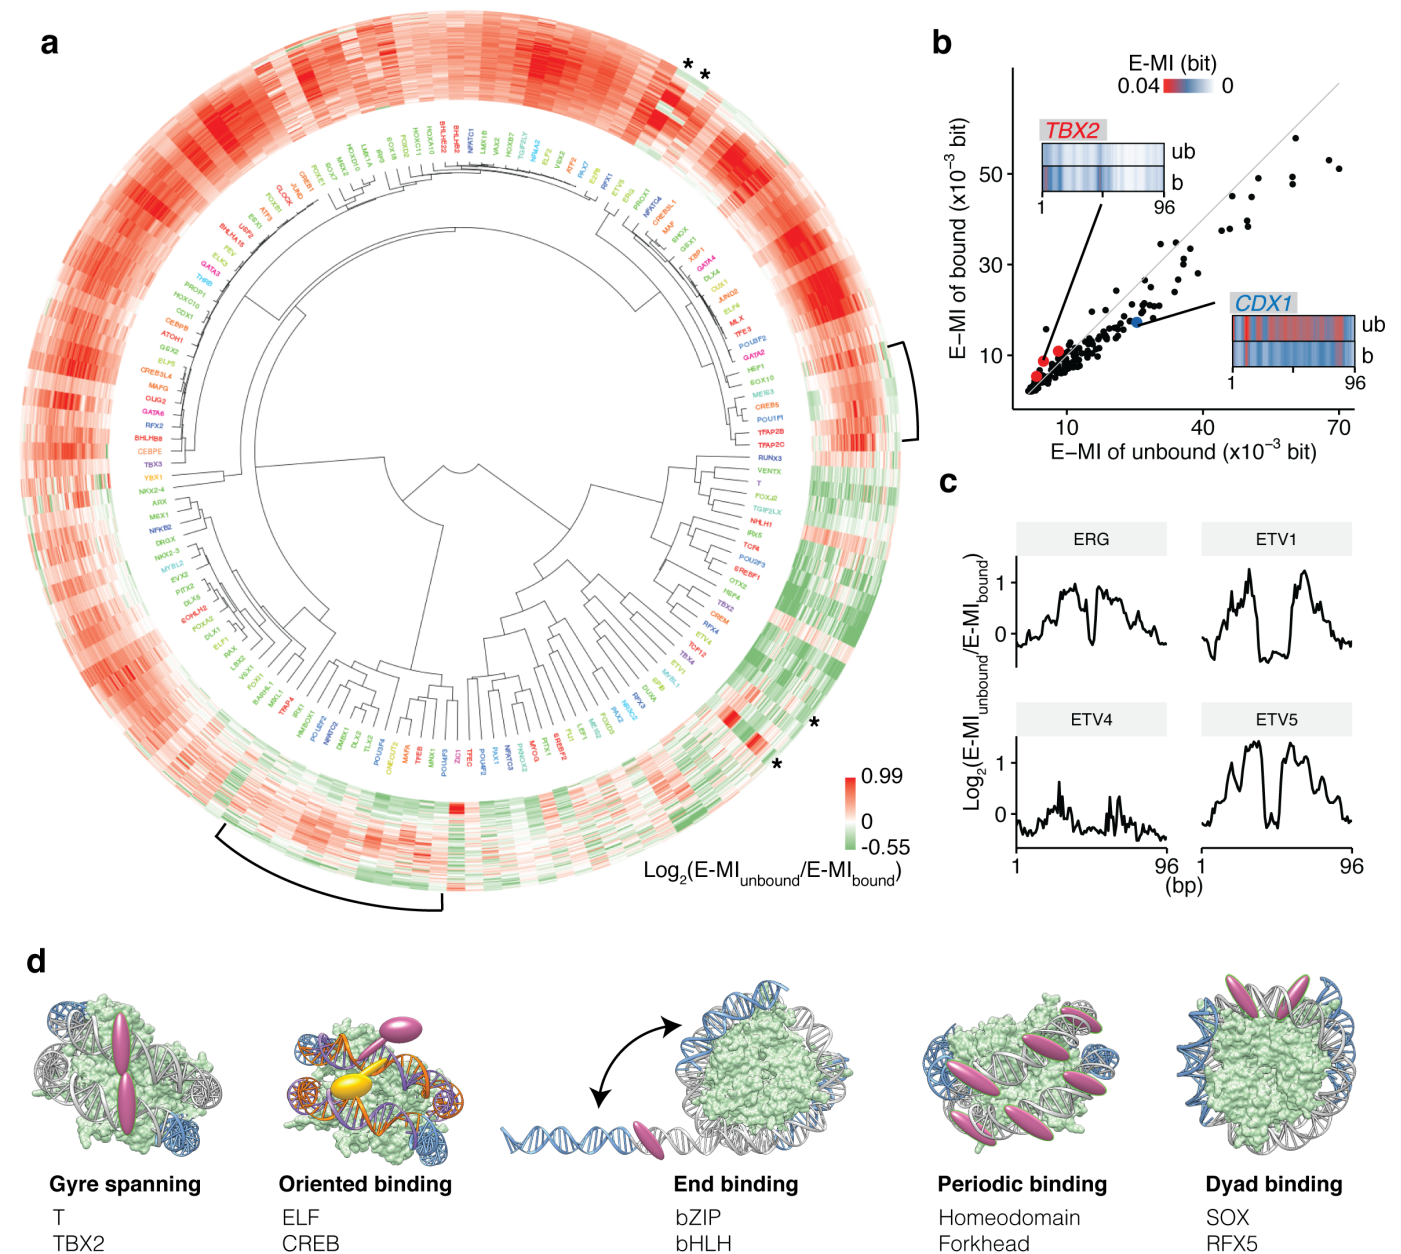

824 **Figure 7 | Effects of TF binding on nucleosome stability and a summary of identified**  
 825 **TF-nucleosome interaction modes.** **a**, Hierarchical clustering of the differential E-MI  
 826 diagonal between the bound and the unbound cycle 5 libraries. TF names are colored to  
 827 encode their family information (coloring scheme as indicated in **Fig. 2a**). Brackets denote  
 828 TFs that both destabilize and stabilize nucleosome in a position-dependent way. Asterisks  
 829 denote the ETS factors with a specific pattern of positional dependence. **b**, Mean strengths of  
 830 E-MI diagonals in the bound and the unbound cycle 5 libraries. The scatterplot shows the  
 831 mean E-MI for the diagonals of each TF (dots), and for both the bound library (y axis) and  
 832 the unbound library (x axis). The grey line represents where  $y=x$ . Most TFs have stronger  
 833 signals in the unbound library (e.g. CDX1, blue). A few TFs show the reverse (e.g. TBX2,  
 834 red). For CDX1 and TBX2 the E-MI diagonals of the bound (b) and the unbound (ub)  
 835 libraries are also illustrated. **c**, Differential E-MI diagonals for the four ETS family TFs  
 836 indicated by asterisks in **(a)**. **d**, The identified major interaction modes of TFs with  
 837 nucleosomal DNA.

## 838 **METHODS**

### 839 **Preparation of histone octamer**

840 A vector encoding *Xenopus laevis* H2A with an N-terminal tag was cloned using  
841 'Round-the-horn site-directed mutagenesis. *X. laevis* histones were expressed and purified as  
842 described previously<sup>39</sup>. Inclusion bodies were resuspended by using a Dounce tissue grinder  
843 (Sigma-Aldrich). Purified histones were aliquoted, flash-frozen, lyophilized, and stored at -  
844 80 °C prior to use. The lyophilized histones were resuspended in unfolding buffer (7 M  
845 guanidine hydrochloride and 10 mM DTT in 20 mM Tris-Cl, pH 7.5) to a concentration of  
846 1.5 mg/ml. N-terminally tagged H2A, H2B, H3 and H4 were then combined at a molar ratio  
847 of 1.2:1.2:1:1. The sample was incubated on ice for 30 minutes before it was dialyzed against  
848 three times 600 ml refolding buffer (2 M NaCl, 1 mM EDTA, and 5 mM β-mercaptoethanol  
849 in 10 mM Tris-Cl, pH 7.5). The sample was recovered after dialysis and applied to a GE  
850 S200 16/600 pg size exclusion column (GE Healthcare, Little Chalfont, United Kingdom).  
851 Peak fractions were analyzed by SDS-PAGE. Fractions containing the octamer were pooled  
852 and concentrated. Both the histone expression and octamer formation have been quality-  
853 controlled (**Extended Data Fig. 1a, b**).

### 854 **Clones, protein expression and purification for TFs**

855 Gateway recipient vectors having a pETG20A backbone were employed in the  
856 bacterial protein expression. Insertions for these expression vectors were derived either from  
857 PCR clones or from gene synthesis; the details are given by Yin *et al.*<sup>54</sup>. The sequences and  
858 domains for all TFs are listed in **Supplementary Table 1**. The non-full-length constructs  
859 contain extended DNA binding domains (eDBDs), with a design rationale reported  
860 previously<sup>38</sup>. We essentially followed Yin *et al.*<sup>54</sup> to express and purify the proteins from *E.*  
861 *coli* cells.

### 862 **Nucleosome CAP-SELEX**

863 The Nucleosome CAP-SELEX (NCAP-SELEX) protocol has two steps of selection,  
864 respectively for ligands bound by the nucleosome and by individual TFs. The DNA ligands  
865 were designed based on Illumina's Truseq library (**Supplementary Table 2**). The adapter  
866 lengths were 24 bp at the left side and 22 bp at the right side. The total lengths of the ligands  
867 are 147 bp for lig147, and 200 bp for lig200, with 101 bp and 154 bp in random, respectively.  
868 The single-stranded oligos of lig147 and lig200 were purchased from IDT (Ultrasmer DNA  
869 oligos). A PCR reaction with primers binding to the adapters (**Supplementary Table 2**,  
870 PCR\_primers) was used to obtain double-stranded DNA from the synthetic oligos, and was  
871 also used to amplify the libraries between SELEX cycles. For sequencing, the ligands were  
872 amplified with the multiplexing primers (**Supplementary Table 2**, PE\_PCR\_primers).

873 In SELEX, first, double-stranded DNA ligand and tagged histone octamer were mixed  
874 in 2 M KCl solution and incubated for 30 min. The mixture was then diluted stepwise as  
875 described by Dyer *et al.*<sup>39</sup>, with a dilution buffer (TE buffer supplemented with 1 mM tris(2-  
876 carboxyethyl)phosphine (TCEP) and a cocktail of protease inhibitors (05892970001,  
877 Roche)). The reconstituted nucleosome was incubated for 30 min with the corresponding

878 affinity beads (pre-blocked with the blocking buffer containing 25mM Tris, 0.5% BSA, 0.1%  
879 tween 20, 0.02% NaN<sub>3</sub>), and at the same time shaken under 1900 rpm with a microplate  
880 shaker (13500-890, VWR). The beads were then washed 15 times with a microplate washer  
881 (Hydrospeed<sup>TM</sup>, Tecan). The nucleosome was eluted and incubated with 10–200 ng purified  
882 TFs for 20 min. The TF-bound species were pulled down with magnetic beads (pre-blocked  
883 with the blocking buffer) and washed 15 times. The bead suspension were used for PCR as  
884 previously described by Jolma *et al.*<sup>38</sup> This process was repeated for four cycles. Ligands  
885 were amplified and sequenced after each cycle and before the experiment (the input). When  
886 incubating the nucleosome with TF, we initially used 140 mM of monovalent cations. The  
887 physiological salt concentration resulted in relatively high nonspecific adsorption of the  
888 nucleosome to the sepharose beads. To improve the assay, lower salt concentrations (50 mM  
889 to 75 mM) were used in subsequent experiments. Most effects were robust to the changes in  
890 the salt concentration; discussion in the main text is limited to observations that were detected  
891 under multiple salt concentrations. Moreover, in SELEX, each cycle is essentially an  
892 independent replicate of the experiment. The reported effects all show enrichment across  
893 multiple SELEX cycles.

894 To interrogate whether the binding of TFs facilitates the dissociation of nucleosome,  
895 we carried out a fifth cycle that further separated the TF-bound species into libraries unbound  
896 and bound by nucleosome. The TF-bound species were depleted for the nucleosome-bound  
897 species with affinity beads for the tag on the histone. The ligands bound by the beads were  
898 collected as the nucleosome-bound libraries. The DNA ligands remaining in the supernatant  
899 were sequenced as the unbound libraries. As a control, the cycle five nucleosome was also  
900 allowed to dissociate in the absence of TFs; the bound library and the unbound library were  
901 collected as described above.

902 As a control, HT-SELEX (SELEX using free DNA) with lig147 or with lig200 was  
903 performed according to the previous protocol<sup>54,55</sup> with the same purified TF proteins as those  
904 used in NCAP-SELEX.

905 The input amount of DNA will exhaust almost all possible 20-bp consecutive or  
906 gapped subsequences. Such complexity well suffices the specificity studies of human TFs,  
907 whose binding is associated with ~15 bits of information on average<sup>55</sup>. For nucleosome, the  
908 complexity allows the study of optimal sequences around each histone-DNA contact, but  
909 might not capture all the specificities as the nucleosome-favored or disfavored sequences may  
910 include cooperation spanning a large length of DNA, e.g., the phased successive bending or  
911 the rigidity of a long segment.

912 The NCAP-SELEX and HT-SELEX library for each TF contains hundreds of  
913 thousands of unique reads. Under this sample size, if a TF is binding nucleosomal DNA  
914 without restrictions, any non-random pattern of TF binding that has a biologically meaningful  
915 effect size (as observed in our study) can only occur with an extremely small p-value.

## 916 **Sequencing and pre-processing**

917 The SELEX ligands amplified with multiplexing primers were purified with AMPure  
918 beads (Beckman Coulter), and sequenced using Illumina Hiseq 2000 or Hiseq 4000, with >80

919 bp paired-end settings. Raw sequences were demultiplexed with bcl2fastq (v2.16.0.10). In  
920 general hundreds of thousands of reads were obtained for each TF.

921 The R1 and R2 reads of paired-end sequencing were merged with PEAR<sup>84</sup> requiring 5  
922 bp overlap at minimum. The merged sequences were discarded if their variable region length  
923 is not the same as the ligand design. The obtained sequences were then trimmed for adaptor  
924 and for quality by Trim Galore (version 0.4.3). All shorter sequences produced during  
925 trimming were removed. The sequences were further cleaned for adaptor sequences by  
926 removing all sequences that contained a 14-bp overlap with Illumina sequences. For further  
927 analysis, we removed the PCR duplicates and used only the unique reads.

## 928 TF signal analysis with E-MI

929 MI between the most enriched 3-mer pairs (E-MI) was calculated for all non-  
930 overlapping position combinations:

$$931 \quad E-MI(pos1, pos2) = \sum_{top \ 3+3-mer} P(3+3-mer) \log_2 \frac{P(3+3-mer)}{P_{pos1}(3-mer)P_{pos2}(3-mer)}$$

932 where  $P(3+3-mer)$  is the observed probability of a 3-mer pair (i.e. gapped or ungapped 6  
933 mer) from position 1 and position 2.  $P_{pos1}(3-mer)$  and  $P_{pos2}(3-mer)$ , respectively, are the  
934 marginal probabilities of the constitutive 3-mers at position 1 and position 2. Their product  
935 represents the expected probability of the 3-mer pair. Sums are over the top 10 most enriched  
936 3-mer pairs, which have the highest ratio between the observed probability and the expected  
937 probability. For the diagonal plot, E-MIs from position pairs where  $pos2 = 3 + pos1$  were  
938 used.

939 Clustering of the E-MI diagonal was performed using the cosine distance metric and  
940 ward.D2 linkage of the *hclust* function in R. The circular representation of the classification  
941 result was generated using the *circlize* R package<sup>85</sup>. To calculate the penetration of E-MI for  
942 each TF, the diagonal of E-MI was first LOESS smoothed with a span of 0.45; next, for each  
943 half of the diagonal, the maximum E-MI value among the half was identified; after that, the  
944 positions where the E-MI decreases to half of the E-MI maximum were taken as the  
945 penetration depth. The final penetration depth is the average value for both halves of the E-  
946 MI diagonal.

947 To check whether the gyre-spanning mode of TF T is preferring nucleosomal DNA,  
948 for both its bound and unbound libraries of cycle 5, the E-MI strength of Mode 2 binding was  
949 evaluated by summing E-MI from 3-mer pairs spaced 77–83 bp, the E-MI strength of the  
950 background was evaluated by summing E-MI from 3-mer pairs spaced 50–70 bp. For both  
951 the binding signal and the background, Log<sub>2</sub> ratios of E-MI strength between the bound and  
952 unbound libraries were calculated for four independent replicates of NCAP-SELEX using TF  
953 T. The obtained ratio indicates whether the signal (or the background) has a different strength  
954 between the two libraries.

955 When comparing E-MI between the bound and the unbound libraries from cycle five,  
956 only TFs with the 3×FLAG tag were considered.

## 957 **Motif matching and PWM (positional weight matrix) generation**

958 Motif matching for each TF was conducted using MOODS<sup>86,87</sup> with p-value set to  
959 0.0001. The motifs used in matching were from our previous curations<sup>54,55</sup>. Motif hits from  
960 both strands were combined unless indicated. When necessary, motifs from NCAP-SELEX  
961 were generated using Autoseed<sup>38,88</sup> with multinomial of 1.

## 962 **Quality control of the SELEX experiments**

963 The successful TFs were called by manually checking the E-MI and motif discovery  
964 results for each TF. The successful TFs has detectably stronger E-MI between neighboring 3-  
965 mer pairs than that between 3-mer pairs far away from each other, and show enriched motifs  
966 that are not contaminations from unrelated TFs.

## 967 **Evaluation of nucleosome-induced orientational preference of TFs**

968 On free DNA, motifs have the same affinity for TF-binding irrespective of its  
969 orientation. This is not true when DNA is wrapped onto a nucleosome as the nucleosome  
970 breaks DNA's 2-fold rotational symmetry. Depending on motif's relative orientation to  
971 nucleosome, the same motifs can differ in affinity. This orientational asymmetry was  
972 examined systematically using the lig200 NCAP-SELEX libraries. For each TF, we first  
973 calculated the binding energy difference ( $\Delta\Delta G$ ) between the two relative orientations for each  
974 of the most enriched non-palindromic 8-mers (top 40 used). The ligands in this TF's SELEX  
975 library were divided into two halves according to the dyad position. The two halves were  
976 calculated separately and then averaged. Similarly to previous studies<sup>89,90</sup>, we assumed a low  
977 TF concentration and that the dissociation during wash is insignificant for high-affinity 8-  
978 mers. Consequently, for each 8-mer and for each half of the ligands, the  $\Delta\Delta G$  of the 8-mer  
979 between the two relative orientations is

$$\Delta\Delta G = -RT \ln \left( \frac{C_{5'}^r / C_{3'}^r}{C_{5'}^0 / C_{3'}^0} \right)^{\frac{1}{r}}$$

980 Here  $C_{5'}$  and  $C_{3'}$  are counts of this 8-mer, respectively for the DNA-strands with their free  
981 ends located at the 5' and the 3' (the other end is at the dyad where we divide). The count  
982 ratio  $C_{5'}/C_{3'}$  in cycle  $r$  was normalized with the count ratio in cycle 0, taken the  $r$ th root to  
983 account for the exponential enrichment in SELEX, and subsequently converted into energy  
984 difference. The directional energy difference for each 8-mer was then averaged for the two  
985 halves of the ligands, and the absolute value is used to represent the orientational asymmetry  
986 of this 8-mer  
987

$$\textit{Orientation asymmetry} = \textit{abs} \left( \frac{1}{2} \sum_{\textit{halves}} \Delta\Delta G \right)$$

988  
989 Orientational asymmetry of the TF is then represented by the mean of the 40 most enriched 8-  
990 mers' orientation asymmetry.

991 To rule out any potential orientational bias induced by the adaptors of the SELEX  
992 ligands, we also calculated the orientation asymmetry values for 8-mers in the HT-SELEX  
993 library. For each TF, the 8-mers used for its HT-SELEX library are the same 8-mers as used

994 for its NCAP-SELEX library. After obtaining the 8-mers' orientation asymmetry values for  
995 both the NCAP-SELEX library and the HT-SELEX library of the TF, we used a one-tailed t-  
996 test to examine if the orientation asymmetry values in the NCAP-SELEX library are larger  
997 than those in the same TF's HT-SELEX library, and obtained the p-value.

998 Signal enrichment in each TF's library was represented using the median fold change  
999 of the 8-mers that are most enriched (top 10 8-mers). The fold change for each 8-mer was  
1000 calculated using  $\log_2(\text{cycle 4 count} / \text{cycle 0 count})$ .

## 1001 **MNase-seq**

1002 In MNase-seq, the LoVo cell line from ATCC was used (CCL-229, tested to be free  
1003 of mycoplasma infection by Hoechst staining). MNase-seq was performed similarly as  
1004 described previously<sup>91</sup>. Specifically,  $10^7$  cells were harvested and washed twice with 10 ml  
1005 cold DPBS (Dulbecco's phosphate-buffered saline), spun down with 350 g for 5 min at 4  
1006 °C. The cells were next crosslinked with 10 ml of 1.1% formaldehyde for 10 min in DPBS,  
1007 tumbling end over end. The crosslinking reaction was quenched with 50  $\mu$ l 2.5 M glycine and  
1008 further tumbled for 2 min, and washed twice with cold DPBS. Lysis of the cells was  
1009 performed with 20 ml 0.5 $\times$  PBS containing 0.5% Triton X-100 for 3 min on ice; the nuclei  
1010 were then collected by centrifugation (350 g, 5 min). Before MNase digestion, the nuclei  
1011 were washed three times with 1 $\times$  MNase digestion buffer, resuspended with 1 ml of the same  
1012 buffer containing 100  $\mu$ g/ml RNase A. An aliquot of 100  $\mu$ l was used for MNase digestion.  
1013 MNase digestion was carried out with 100 units of MNase (M0247S, NEB) at 37 °C for 8  
1014 min, quenched with 100  $\mu$ l stop buffer (40 mM EDTA, 40 mM EGTA, 1% SDS, 1.5 mg/ml  
1015 proteinase K) at 65 °C o/n. The MNase fragments with length of 100–1000 bp were selected  
1016 using Ampure beads (Beckman Coulter), and subjected to the library preparation workflow of  
1017 Illumina (E7370L, NEB). The paired-end sequencing (2  $\times$  86 bp) was performed using  
1018 Illumina HiSeq 4000.

1019 MNase-sequencing data from K562 cell line were downloaded from GEO accession  
1020 GSE78984. Three titration series (20.6U, 79.2U and 304U) of MNase were selected.

1021

## 1022 **Combined analysis of MNase-seq and ChIP-seq**

1023 For MNase-seq data, the raw sequencing reads were quality and adapter trimmed with  
1024 cutadapt version 1.12 in Trim Galore (version 0.4.3). Low-quality ends trimming was done  
1025 using Phred score cutoff 30. Adapter trimming was performed using the first 13 bp of the  
1026 standard Illumina paired-end adapters with default parameters. Raw sequencing reads were  
1027 mapped to the human reference genome (hg19) using bwa<sup>92</sup> with default parameters.  
1028 Duplicates were removed with samtools (v 1.3.1) rmdup function. Insert size distribution was  
1029 calculated based on 10000 reads that were aligned to autosomes. After duplicate removal,  
1030 data from K562 titration series were merged.

1031 Coverage of MNase fragments with length >140bp was calculated at ChIP-seq peaks  
1032 of 20 TFs in K562 cell lines. We selected 500 highest signal ChIP-seq peaks that had  
1033 respective TF's motif match site and did not overlap with hg19 blacklist genomic regions.

1034 BEDtools (v2.26.0) genomecov and intersect functions were utilized in calculations.  
1035 ENCODE narrowPeak calls including two replicates were used from March 2012 freeze  
1036 (UCSC wgEncodeAwgTfbsUniform track) release for ATF3, CEBPB, CTCF, ELF1,  
1037 GATA2, JUND, SRF, USF2 and YY1, and from later releases (the ENCODE Portal  
1038 <http://www.encodeproject.org>, accessed 07/12/2017) for ATF2, CREB3L1, CREM, ELF4,  
1039 HMBOX1, MYBL2, NFATC3, PKNOX1, RFX1, SREBF1 and YBX1<sup>72</sup>. Genomic sites  
1040 recognized by each motif retrieved from previous HT-SELEX runs were searched from the  
1041 human genome using program MOODS<sup>86</sup> with a p-value cut-off of  $10^{-4}$  and a score cut-off of  
1042 5. Final MNase fragment coverage values were calculated by taking the average of multiple  
1043 motifs for each TF, and correlated with E-MI penetration values with Pearson's method.

1044 V-plots were generated as described by Henikoff *et al.*<sup>45</sup>. MNase-fragments aligned to  
1045 autosomes were used. The LoVo ChIP-seq data from Yan *et al.*<sup>37</sup> were downloaded from  
1046 GEO accession GSM1239499 and GSM1208610. The peak calls were transformed from  
1047 hg18 to hg19 coordinates by using UCSC liftOver and peaks within hg19 blacklist genomic  
1048 regions were excluded. Genomic sites recognized by each motif were searched from the  
1049 human genome using MOODS<sup>86</sup> with a p-value cut-off of  $10^{-4}$  and a score cut-off of 5.  
1050 Center-point coordinates of MNase-fragments and motif sites within ChIP-peaks were  
1051 compared using BEDtools (v2.26.0) closest function using strand information of each motif  
1052 match.

### 1053 **Fast Fourier Transformation (FFT) analysis and structure alignment**

1054 The diagonal of E-MI for each TF's library was subtracted with the mean, windowed  
1055 by Welch's function, and then subjected to FFT. The obtained power spectrum was further  
1056 divided with the mean of the E-MI diagonal and the length of the diagonal. We next  
1057 calculated FFT-AUC (area under the curve) from the power spectrum and used it as an  
1058 indicator for the ~10 bp periodicity induced by nucleosome. The FFT-AUC was calculated  
1059 for frequencies ranging from 0.08–0.12 bp<sup>-1</sup> and subtracted with the baseline level (estimated  
1060 from 0.14–0.3 bp<sup>-1</sup>). The phase of FFT was examined at 0.102 bp<sup>-1</sup>. The same process was  
1061 applied to the TA dinucleotide counts across all positions of the ligand for the NCAP-SELEX  
1062 library of all individual TFs.

1063 To mimic the in-phase and out-of-phase bindings of the periodic binders with respect  
1064 to the preferred TA positions on nucleosome, the available structure of TF-DNA complex  
1065 was aligned to the nucleosome by matching the center of the TF's core binding sequence  
1066 either to the TA step (in phase), or to a step 5-bp downstream of the TA step (out of phase).  
1067 The 6-bp core binding sequence in the structure of TF-DNA complex is defined according to  
1068 the most enriched 6-mers in this TF's NCAP-SELEX library. To make the alignment, C1–C4  
1069 on all deoxyribose rings were matched between the 6-bp core binding sequence and the 6-bp  
1070 nucleosomal DNA centered in-phase or out-of-phase to the TA step.

### 1071 **Electrophoretic mobility shift assay (EMSA)**

1072 Nucleosomes were formed essentially as described previously<sup>39</sup> from the histone  
1073 octamers and the modified Widom 601<sup>93</sup> DNA sequence

1074 CTGGAGAATCCCGGTCTGCAGGCCGCTCAATTGGTCGTAGACAGCTCTAGCACCG  
1075 CTTAAACGCACGTACGGTATTGTTTATTTGTTCTCCGCCAAGGGGATTACTCCC  
1076 TAGTCTCCAGGCACGTGTCAGATATATACATCCTGT. The modified Widom 601 is  
1077 embedded with a SOX11-binding segment (GGTATTGTTTATTTTGTTCCT) at the center.  
1078 The sequence of the embedding segment is extracted from a ligand in the cycle 4 SELEX  
1079 library of SOX11. The embedding position on Widom 601 is the same as the segment's  
1080 original position on the SELEX ligand. Nucleosomes were reconstituted using this modified  
1081 Widom 601 ligand and subsequently heat-shifted at 55°C for 30 min. Next the nucleosomes  
1082 (containing 1 µg DNA) were incubated on ice with purified SOX11 eDBD in a 40 µl volume.  
1083 As a control, the SOX11 eDBD were also directly incubated with 1 µg modified Widom 601  
1084 ligand in 40 µl volume. The samples were then subjected to EMSA. A 0.8% agarose gel was  
1085 cast and run in the 0.2x Tris–Boric acid–EDTA (TBE) buffer. EMSA was performed in  
1086 native conditions at 4°C for 1 h at 120 V, and later the gel was post-stained in DNA Stain  
1087 Clear G (Serva). The DNA ladder 100 bp (NEB) was used as the marker.

1088

- 1089 84 Zhang, J. J., Kobert, K., Flouri, T. & Stamatakis, A. PEAR: a fast and accurate Illumina Paired-End  
1090 reAd mergeR. *Bioinformatics* **30**, 614-620 (2014).
- 1091 85 Gu, Z., Gu, L., Eils, R., Schlesner, M. & Brors, B. *circIz* Implements and enhances circular  
1092 visualization in R. *Bioinformatics* **30**, 2811-2812 (2014).
- 1093 86 Korhonen, J., Martinmaki, P., Pizzi, C., Rastas, P. & Ukkonen, E. MOODS: fast search for position  
1094 weight matrix matches in DNA sequences. *Bioinformatics* **25**, 3181-3182 (2009).
- 1095 87 Pizzi, C., Rastas, P. & Ukkonen, E. Finding significant matches of position weight matrices in linear  
1096 time. *IEEE/ACM Trans. Comput. Biol. Bioinform.* **8**, 69-79 (2011).
- 1097 88 Nitta, K. R. *et al.* Conservation of transcription factor binding specificities across 600 million years of  
1098 bilateria evolution. *Elife* **4**, e04837 (2015).
- 1099 89 Slattery, M. *et al.* Cofactor binding evokes latent differences in DNA binding specificity between Hox  
1100 proteins. *Cell* **147**, 1270-1282 (2011).
- 1101 90 Riley, T. R. *et al.* SELEX-seq: a method for characterizing the complete repertoire of binding site  
1102 preferences for transcription factor complexes. *Methods Mol. Biol.* **1196**, 255-278 (2014).
- 1103 91 Mieczkowski, J. *et al.* MNase titration reveals differences between nucleosome occupancy and  
1104 chromatin accessibility. *Nat. Commun.* **7**, 11485 (2016).
- 1105 92 Li, H. & Durbin, R. Fast and accurate short read alignment with Burrows-Wheeler transform.  
1106 *Bioinformatics* **25**, 1754-1760 (2009).
- 1107 93 Lowary, P. T. & Widom, J. New DNA sequence rules for high affinity binding to histone octamer and  
1108 sequence-directed nucleosome positioning. *J. Mol. Biol.* **276**, 19-42 (1998).
- 1109 94 Collings, C. K., Fernandez, A. G., Pitschka, C. G., Hawkins, T. B. & Anderson, J. N. Oligonucleotide  
1110 sequence motifs as nucleosome positioning signals. *PLoS ONE* **5**, e10933 (2010).
- 1111 95 Jolma, A. *et al.* Multiplexed massively parallel SELEX for characterization of human transcription  
1112 factor binding specificities. *Genome Res.* **20**, 861-873 (2010).



1113 **EXTENDED DATA FIGURES**

Extended Data Figure 1, Zhu et al. 2017

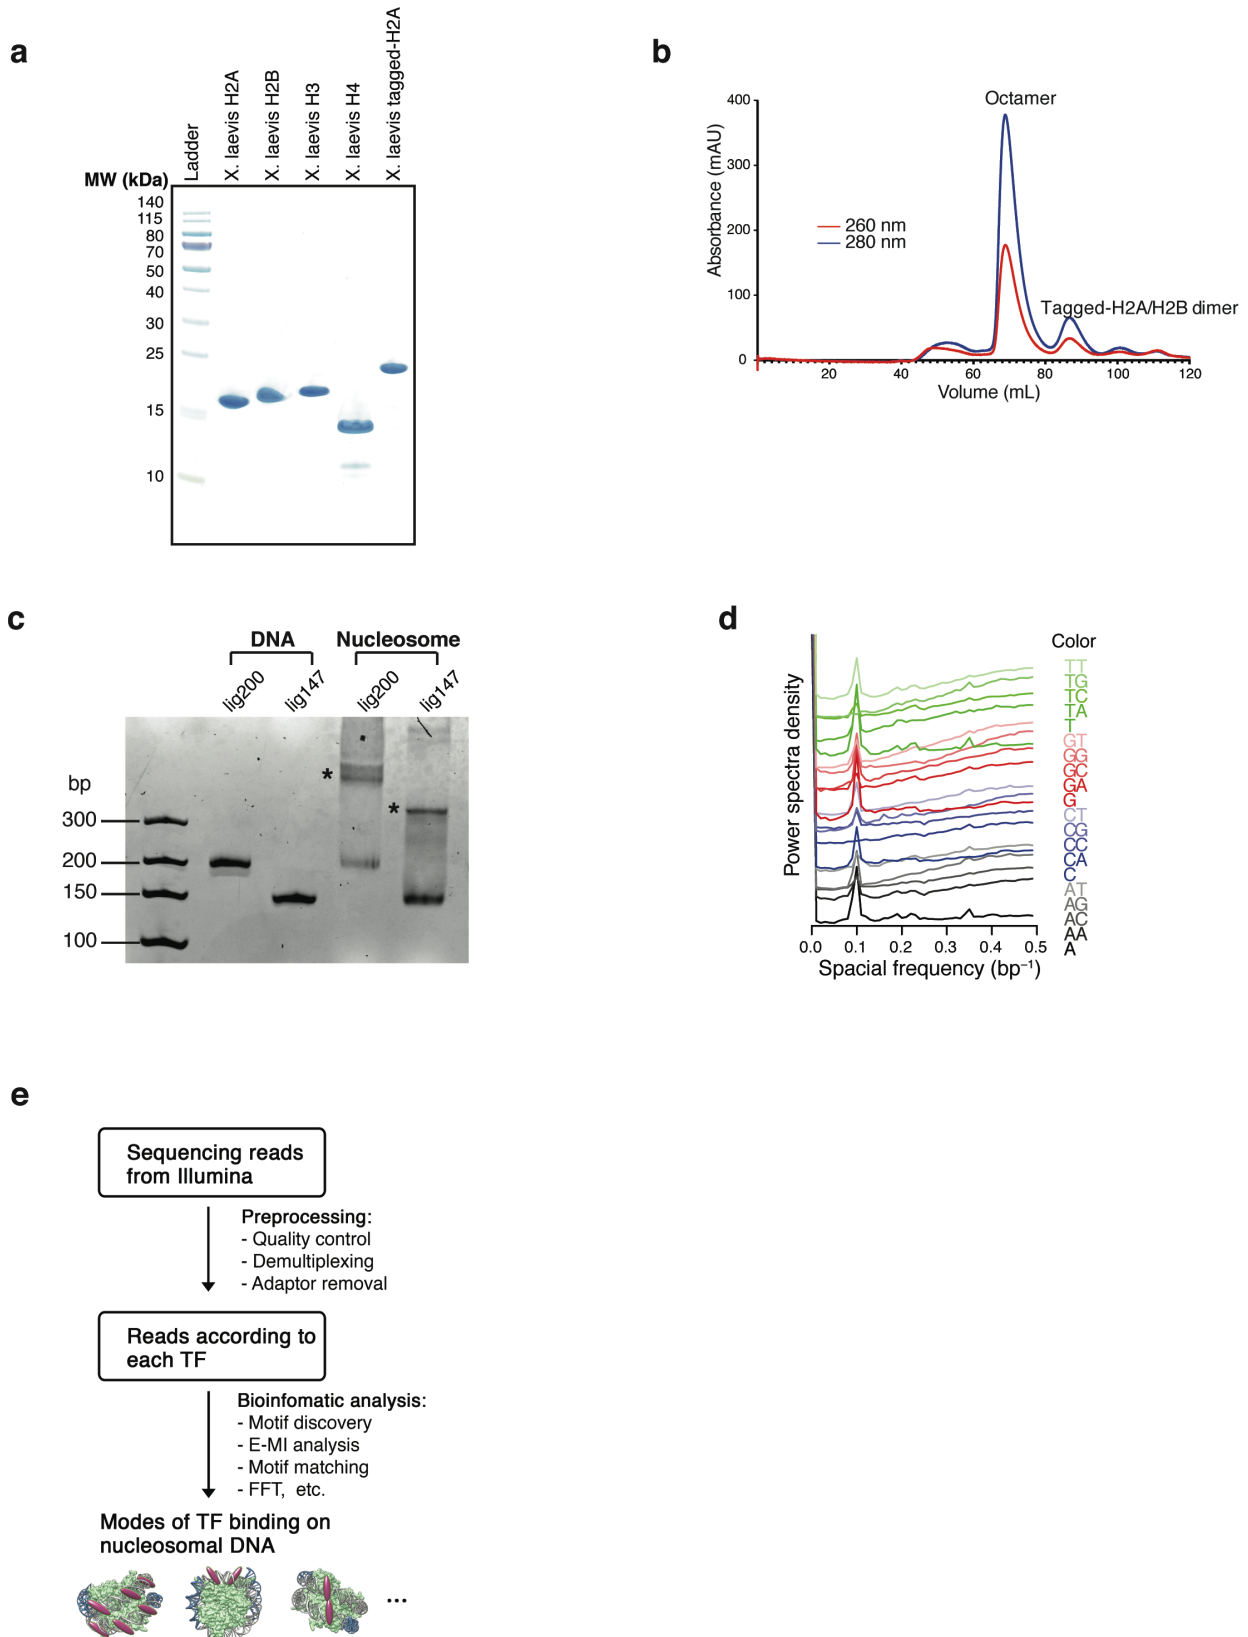

1115 **Extended Data Figure 1 | Quality control and analysis pipeline. a**, Expression of the  
1116 recombinant histones from *X. laevis*. For each lane 3  $\mu\text{g}$  histone is loaded. **b**, Size-exclusion  
1117 chromatogram of the histone octamer. **c**, EMSA result showing the reconstituted  
1118 nucleosomes using lig147 and lig200. The original ligands are also loaded as reference. The  
1119 asterisks indicate the nucleosome bands. **d**, Oligonucleotide periodicity in the library  
1120 enriched by nucleosome. As a quality control of nucleosome reconstitution, we verified  
1121 whether nucleosome by itself is enriching the previously reported  $\sim 10$ -bp periodic  
1122 oligonucleotide signal<sup>93,94</sup>. Nucleosome SELEX (without TF) were carried out for four cycles  
1123 to enrich nucleosome-favoring ligands. The counts of each single and di-nucleotide across  
1124 each individual ligand were Fourier transformed and summed up for the whole library. A  
1125 clear peak around  $0.1 \text{ bp}^{-1}$  (corresponding to the reported  $\sim 10$ -bp periodicity) is visible for  
1126 most mono and dinucleotides. **e**, Analysis pipeline for the ligands enriched in NCAP-SELEX.  
1127

## Extended Data Figure 2, Zhu et al. 2017

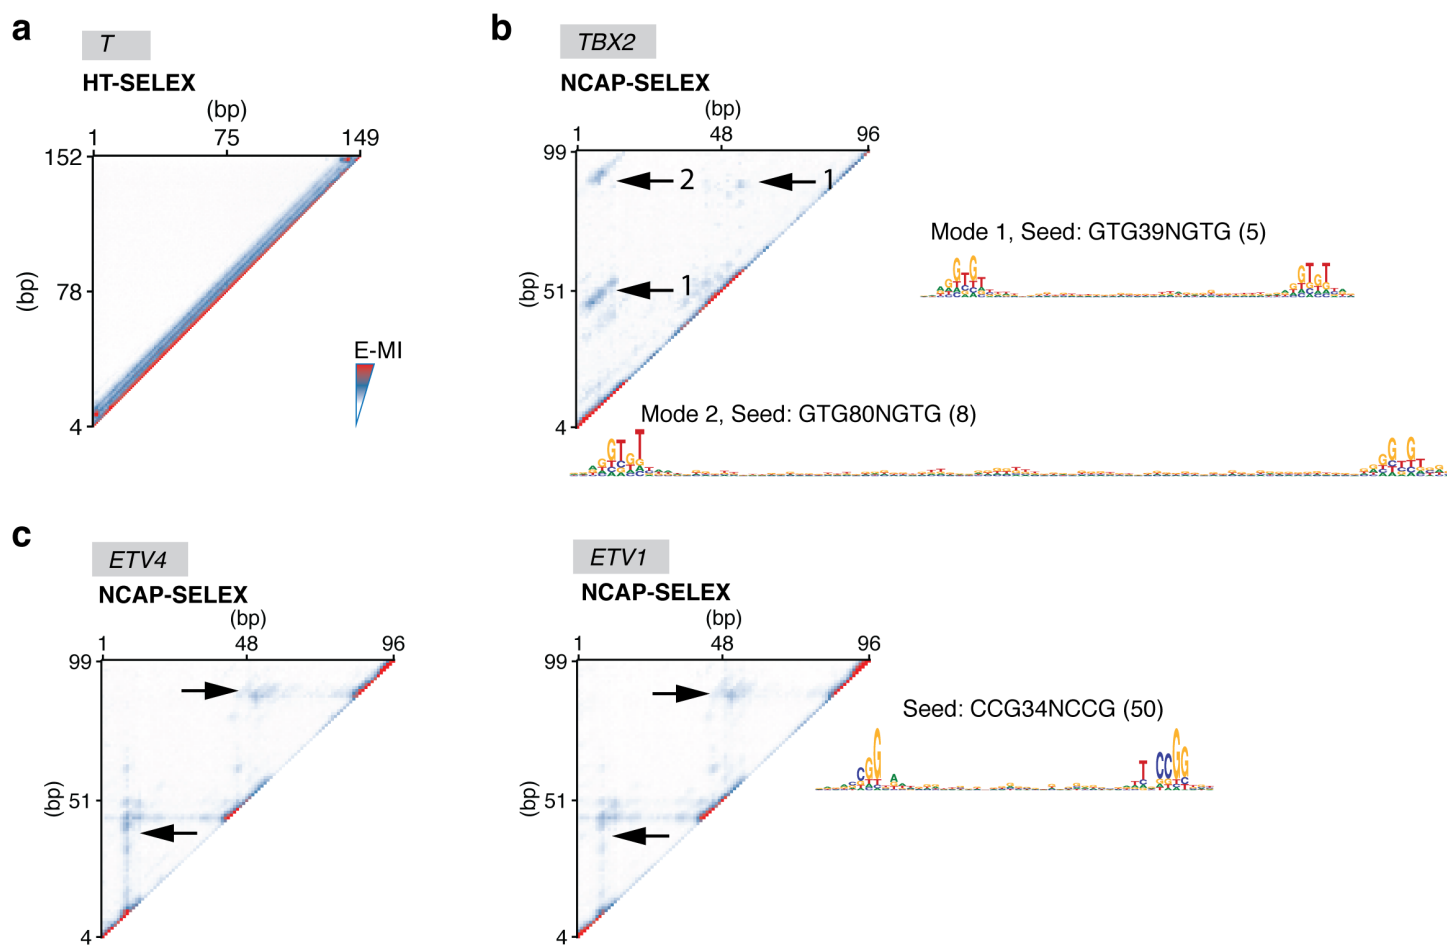

1128

1129 **Extended Data Figure 2 | Specific binding modes allowed on nucleosome. a**, E-MI  
1130 heatmap of T (brachyury) in HT-SELEX using lig200. Pairwise E-MI for all 3-mer pairs is  
1131 presented as a heatmap. The signal is only visible near the diagonal, no E-MI signal across  
1132 ~80 bp is detected. **b**, E-MI heatmap of TBX2 in NCAP-SELEX using lig147. The E-MI  
1133 signals across ~80 (mode 1) and ~40 bp (mode 2) are indicated. The corresponding motif of  
1134 each mode is derived with the indicated seed for a specific position (number in the  
1135 parentheses) in the high E-MI regions. PWM generation follows our previous method<sup>95</sup> using  
1136 multinomial 1. **c**, E-MI heatmap of ETV4 and ETV1 in NCAP-SELEX using lig147. The E-  
1137 MI signal across ~40 bp is indicated. The motif is derived as in (b).

1138

## Extended Data Figure 3, Zhu et al. 2017

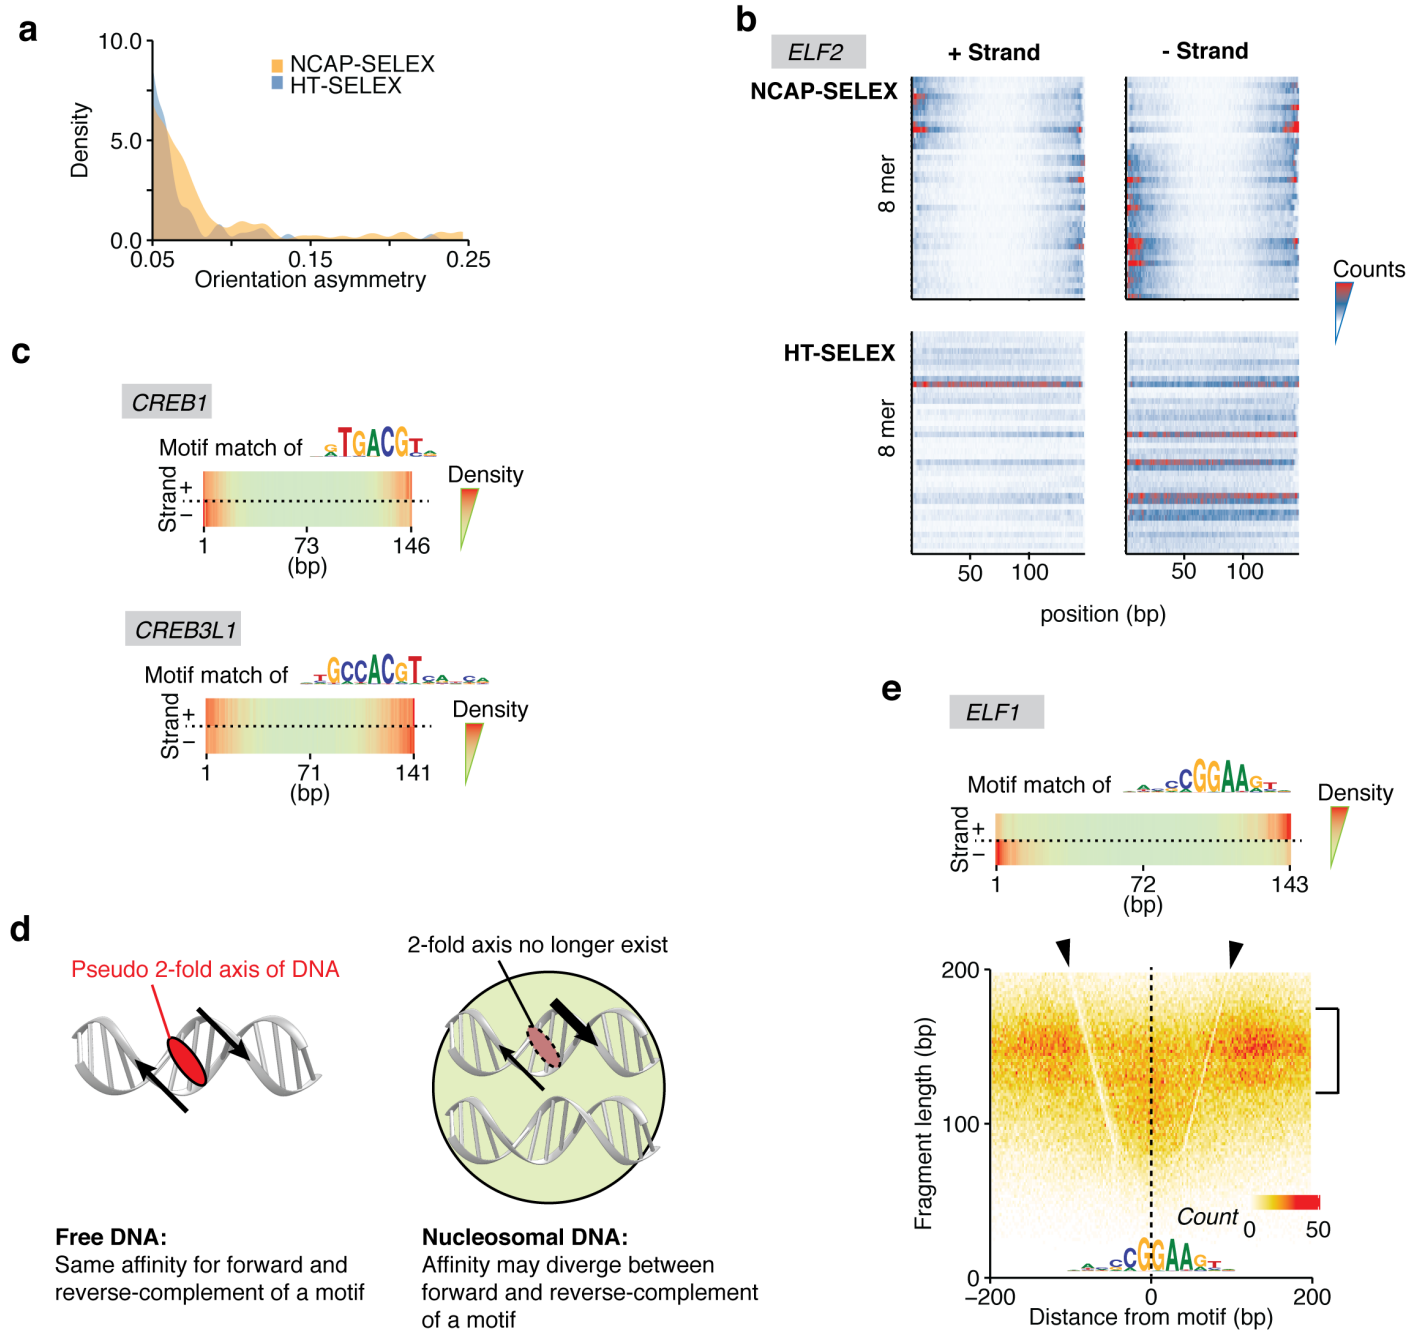

1139

### 1140 **Extended Data Figure 3 | Nucleosome breaks the rotational symmetry of DNA. a,**

1141 Density plot representing the orientation asymmetry of all TFs in NCAP-SELEX and in HT-

1142 SELEX. In NCAP-SELEX, more TFs bind with high orientational asymmetry than in HT-

1143 SELEX. A few TFs can prefer different ends of the ligand for the two binding directions in

1144 HT-SELEX; this is likely induced by the adaptor sequences. However, there are more TFs

1145 with higher orientational asymmetry in NCAP-SELEX libraries, despite the fact that for most

1146 TFs their signals are stronger in HT-SELEX libraries. **b,** Orientation asymmetry of ELF2

1147 revealed by using top 8-mers. Each row of the heatmap corresponds to the counts distribution

1148 of a top 8-mer (non-palindromic) across the positions of the SELEX ligand. Hits of the top 8-

1149 mers occur at different ends for different strands of nucleosomal DNA (i.e. an 8-mer and its

1150 reverse-complement prefer different ends), whereas their distribution is relatively  
1151 homogeneous for free DNA. **c**, Orientation asymmetry of CREB TFs. CREB TFs have  
1152 different motif density distributions for the two strands of nucleosomal DNA. The motif used  
1153 for matching is indicated above. The “-” strand profile is from the density of the reverse-  
1154 complement motif. **d**, Break of the 2-fold rotational symmetry of DNA induces preferred  
1155 orientation of TFs. Left: free DNA has a 2-fold axis (red ellipse) perpendicular to the helix  
1156 axis. Motifs in two orientations are symmetric with each other with respect to a 180° rotation  
1157 centered on the axis. Right: for motifs on nucleosomal DNA, if the other strand of DNA or  
1158 the histone proteins (green) affects binding, the 2-fold axis of DNA no longer exists, as a  
1159 180° rotation centered on the axis no longer generates an identical conformation (the rotated  
1160 image not superimposable with the original one). **e**, Orientational asymmetry of ELF1 on  
1161 nucleosomal DNA. Similar to ELF2, ELF1 has different motif density distributions for the 2  
1162 strands of nucleosomal DNA (top panel). The distribution of MNase fragments around  
1163 genomic ELF1 sites is also asymmetric (bottom panel); footprint of ELF1 is indicated with  
1164 the arrowheads (the V-shaped lines with a lower signal density), and the range of fragment  
1165 length that corresponds to nucleosome occupation are indicated with the bracket.  
1166

Extended Data Figure 4, Zhu et al. 2017

**a**

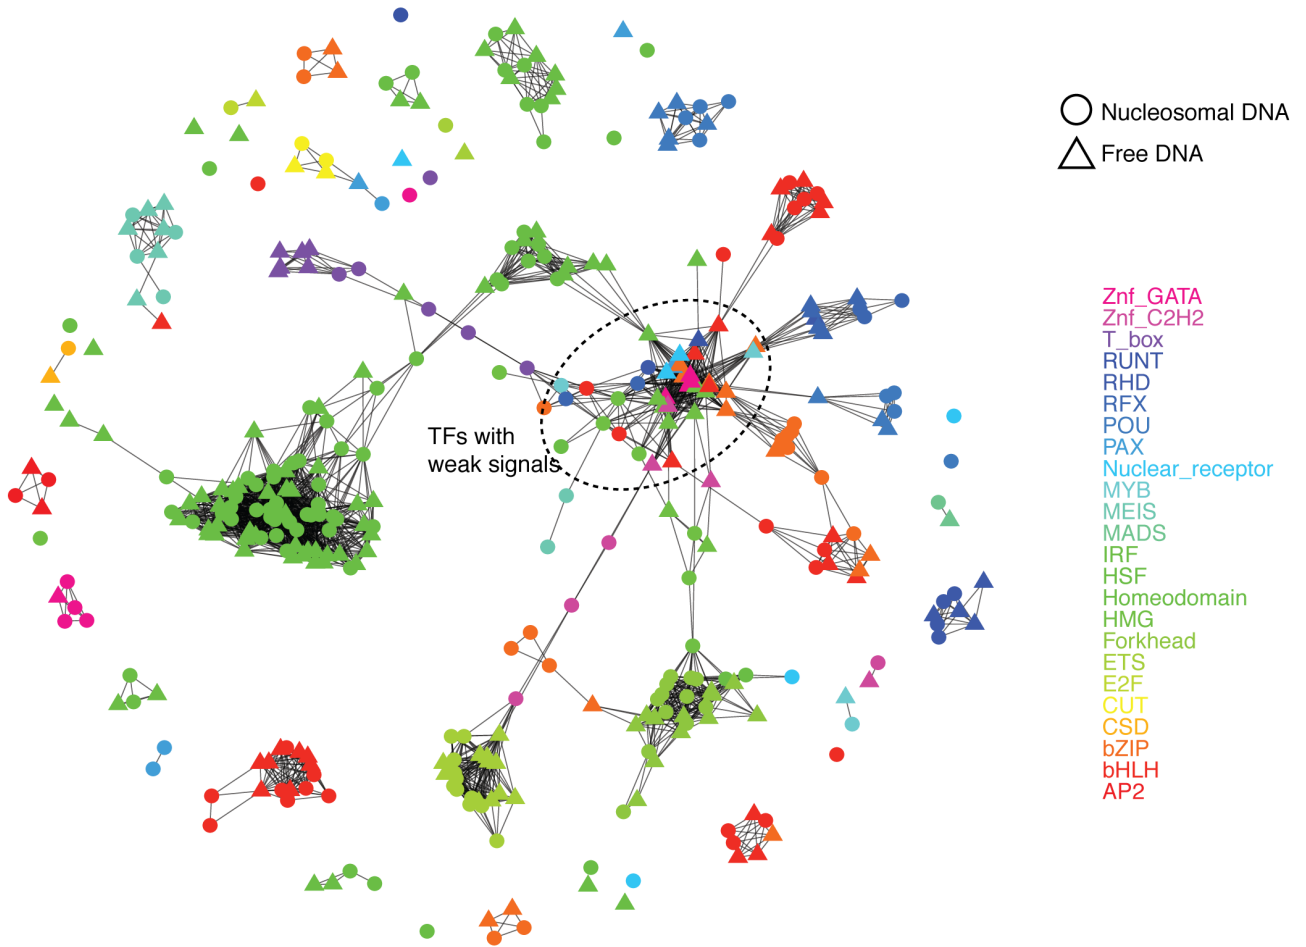

**b**

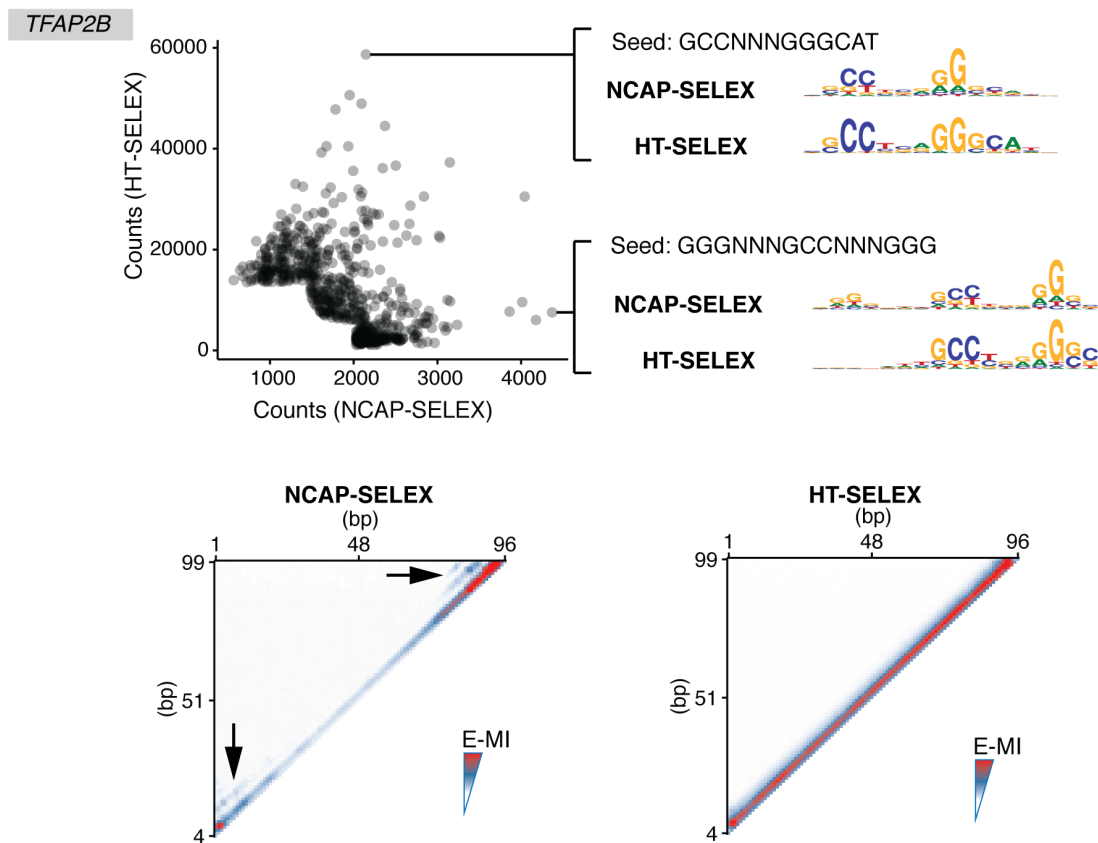

1168 **Extended Data Figure 4 | Most TFs bind nucleosomal DNA without significant motif**  
1169 **change. a**, Network representation of TFs' specificities in presence and absence of the  
1170 nucleosome. Vertices indicate the binding specificity profiles of TF eDBDs, either in the  
1171 presence (circle) and in the absence (triangle) of the nucleosome. Vertices are colored  
1172 according to the TF's family. Two vertices are connected by an edge if the profiles they  
1173 represent are similar. Specifically, we assume that all 9-mer counts in the library enriched by  
1174 a TF will serve as a profile to represent its binding specificity. To evaluate the similarity  
1175 between two profiles, we selected the most abundant 9-mers (top 0.1%) from either of the  
1176 profiles, and calculated Pearson's correlation using counts of these 9-mers from both of the  
1177 two profiles. An edge is drawn between the profiles (vertices) if the calculated correlation is  
1178 greater than 0.2. TFs from the same family generally clusters together regardless of the  
1179 presence of nucleosome, indicating that TFs' binding specificity is not significantly affected  
1180 by nucleosome. TF profiles with weak signals also tend to cluster together (the cluster circled  
1181 by dashed line), as the top 9-mers in their libraries are dominated by SELEX bias (e.g. the  
1182 bias from PCR or wash) rather than by the TFs' specificities. **b**, TFAP binds nucleosomal  
1183 DNA with slightly different specificity than free DNA. The scatter plot (top panel) shows the  
1184 counts of gapped 9-mers from SELEX libraries of TFAP2B, enriched with NCAP-SELEX (x  
1185 axis) and HT-SELEX (y axis). The examined 9-mers consists of three segments of trimers  
1186 interspaced with two gaps (0–5 bp). Only the most enriched 9-mers (top 300 in each library  
1187 and in the combined library) are shown from clarity. For comparison, the most differentially  
1188 enriched gapped 9-mers were also used as seeds to derive the corresponding motifs from both  
1189 libraries (right). The heatmap (bottom panel) shows the pairwise E-MI for all combinations of  
1190 positions on lig147, in the presence (left) and absence (right) of nucleosome. The arrowheads  
1191 indicate the additional signals developed in the presence of nucleosome.  
1192

## Extended Data Figure 5, Zhu et al. 2017

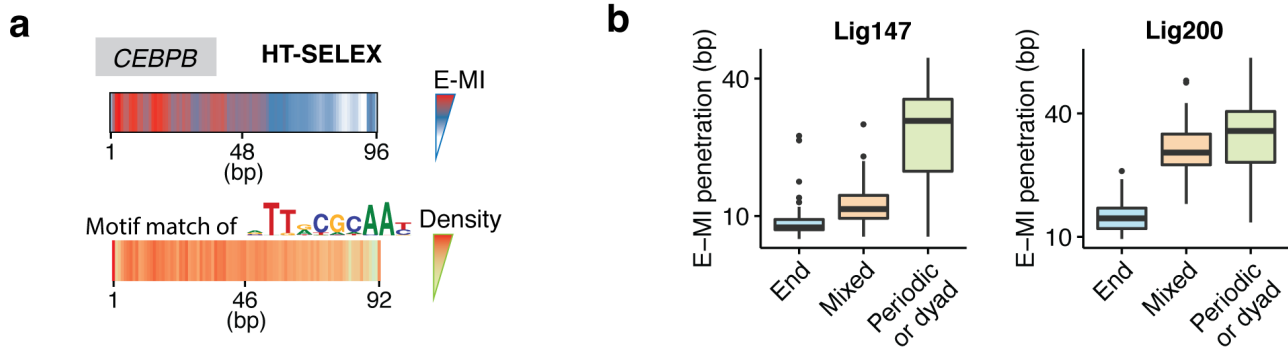

1193

1194 **Extended Data Figure 5 | Control experiment for the end-binders and E-MI penetration**

1195 **according to binder classes. a**, E-MI diagonal and motif matching results for the bZIP factor

1196 CEBPB in HT-SELEX. Without nucleosome, its signal distributes relatively homogeneously

1197 across the ligand. **b**, Penetration of E-MI signal for each binder class of TFs on lig147 and

1198 lig200. The results with SELEX ligands of different lengths generally correspond with each

1199 other. The periodic/dyad binders show deeper E-MI penetration than the end binders and thus

1200 are more capable of binding nucleosomal DNA. The boxes indicate the middle quartiles,

1201 separated by median line. Whiskers indicate last values within 1.5 times the interquartile

1202 range for the box.

1203



## Extended Data Figure 6, Zhu et al. 2017

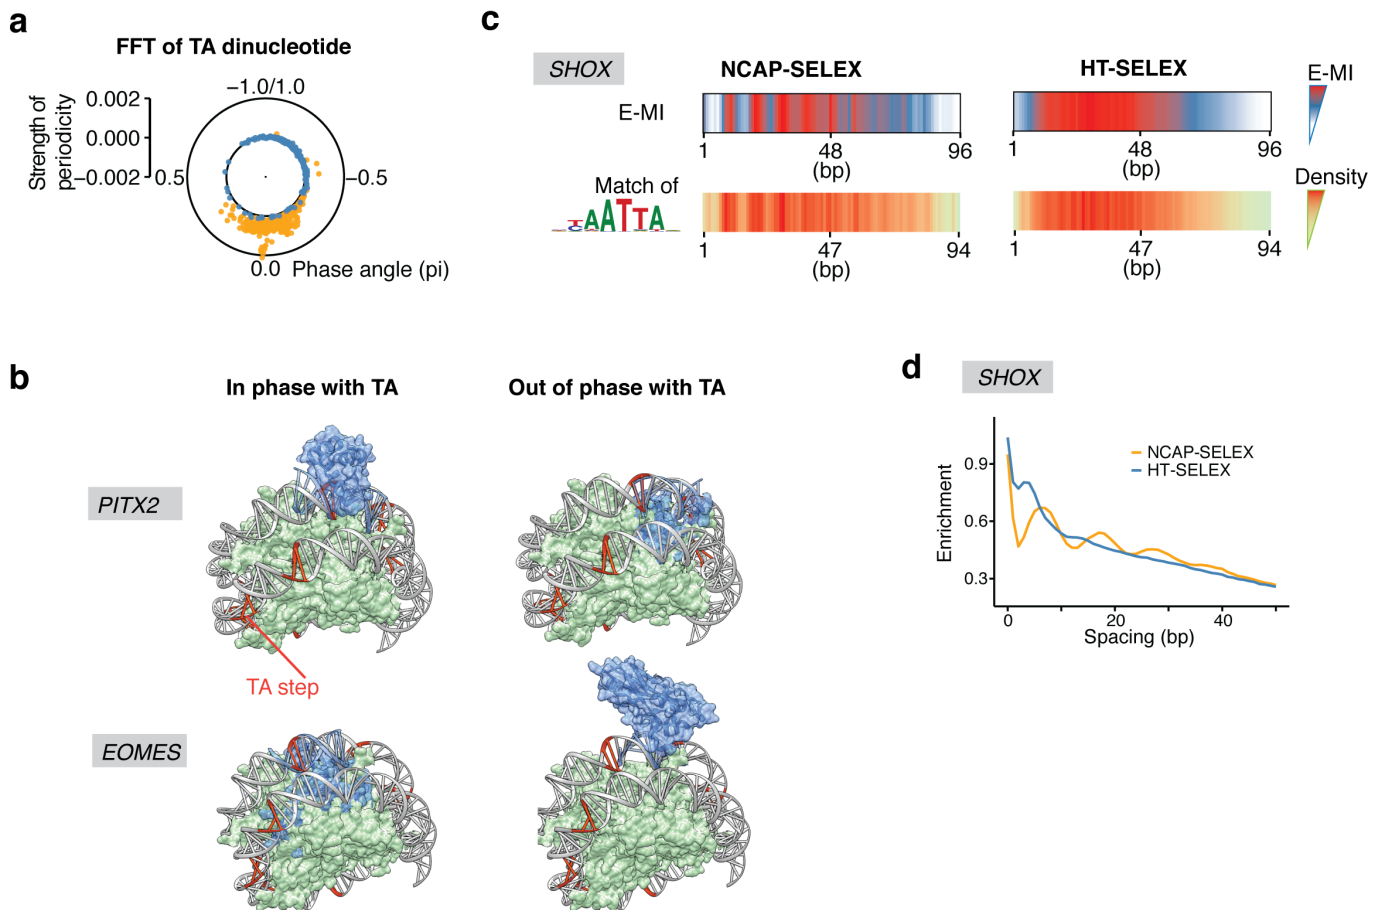

1204

1205 **Extended Data Figure 6 | Analysis of the periodic binders.** **a**, Strength and phase of the  
 1206 ~10 bp periodicity of TA dinucleotide in NCAP-SELEX and HT-SELEX libraries. For the  
 1207 library (lig147) enriched by a specific TF, the strength and phase information is derived from  
 1208 FFT of the TA counts at each position of the library. In the polar plot, each dot represents one  
 1209 TF's library. The overall periodicity is stronger in the NCAP-SELEX libraries (yellow) than  
 1210 in the HT-SELEX libraries (blue), suggesting an enrichment of nucleosome signal. The TA  
 1211 phases in all TFs' NCAP-SELEX libraries are similar, thus the rotational positioning of  
 1212 nucleosome on the SELEX ligand is similar for all TF's libraries. **b**, Cartoon representations  
 1213 of the 3D structures of PITX3 (PDB 2lkx) and TBX5 (T\_box, PDB 2x6v) in complexes with  
 1214 nucleosomal DNA. The DNA ligand in the nucleosome structure (PDB 3ut9) contains phased  
 1215 TA steps (orange). Consistent with the SELEX result, PITX is more compatible with  
 1216 nucleosomal DNA when it binds in phase with TA, whereas T-box is more compatible when  
 1217 it binds out of phase with TA. **c**, E-MI diagonal and motif matching results for SHOX in  
 1218 NCAP-SELEX and HT-SELEX. **d**, The ~10 bp periodicity for the preferred spacing of  
 1219 SHOX dimers on nucleosomal DNA. In NCAP-SELEX libraries of many periodic binders  
 1220 (SHOX as an example), enrichment of the most abundant 3-mer tandem repeats oscillates as  
 1221 a function of the spacing between the repeats. The enrichment is evaluated by log<sub>2</sub>-ratio  
 1222 between the observed and expected occurrences.

1223

## Extended Data Figure 7, Zhu et al. 2017

**a**

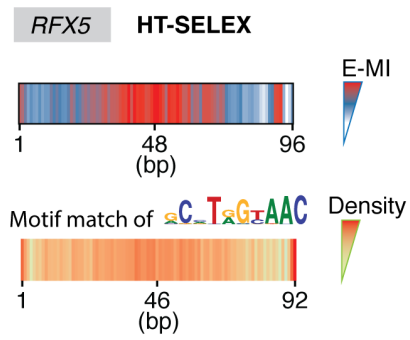

1224

1225 **Extended Data Figure 7 | Analysis of the dyad binders. a**, E-MI diagonal and motif  
1226 matching results for RFX5 in HT-SELEX. The distribution of binding events is homogeneous  
1227 in the absence of nucleosome.

1228

## Extended Data Figure 8, Zhu et al. 2017

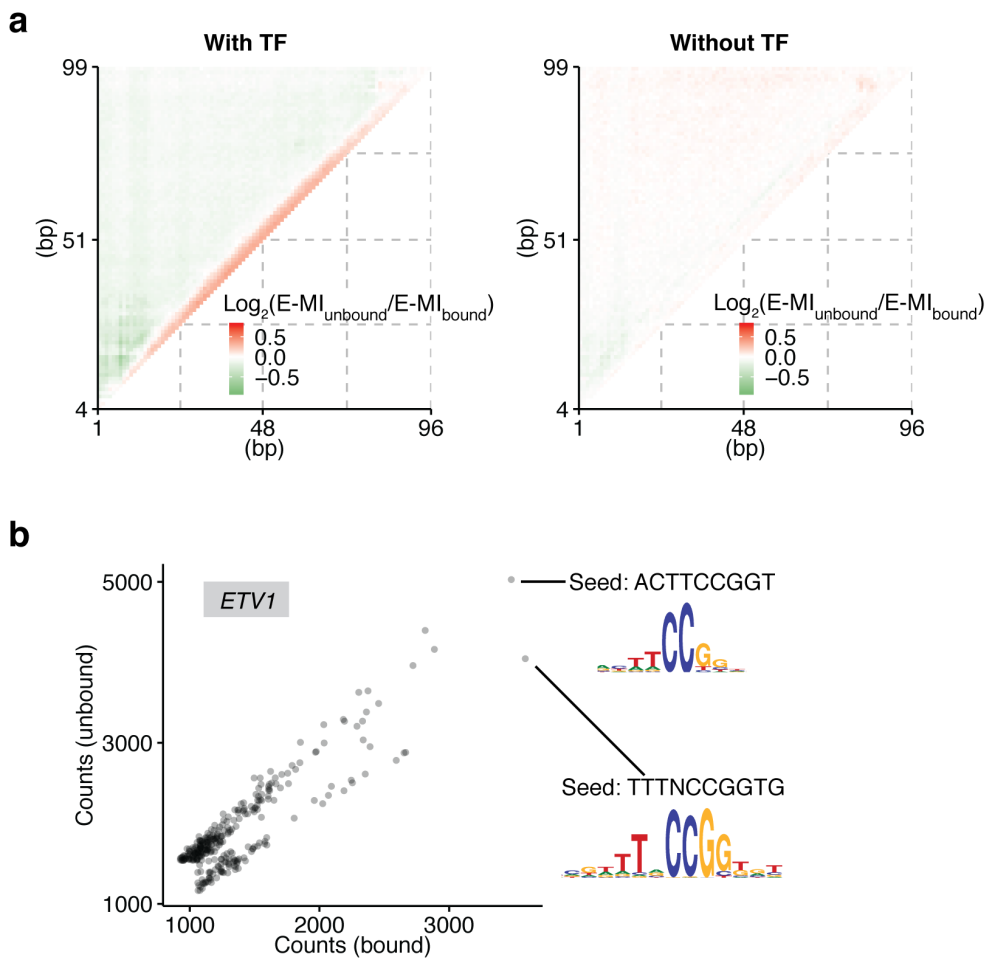

1229

### 1230 **Extended Data Figure 8 | Effects of TF binding on the stability of nucleosome.**

1231 **a**, E-MI difference between the bound and the unbound cycle 5 libraries. The bound and the  
1232 unbound libraries were collected either in the presence (left) or in the absence (right) of TFs.  
1233 The heatmaps visualize E-MI differences between the bound and unbound libraries for all  
1234 position combinations of 3-mer pairs, and each pixel on the heatmap is a mean of all the  
1235 examined TFs' E-MI difference at this pixel. For individual TFs, value at each pixel is  
1236 calculated as  $\log_2(E-MI_{unbound}/E-MI_{bound})$ . Testing nucleosome dissociation in the absence of  
1237 TF was aimed to verify whether the TF motifs on lig147 by themselves can affect the  
1238 nucleosome's stability. **b**, The efficiency of nucleosome dissociation induced by ETV1 is  
1239 dependent on its binding mode. The shorter mode is more efficient than the longer mode in  
1240 displacing nucleosome, as it enriches more in the dissociated library (unbound).
